# Supplementary material
Source: ML conference proceedings conference paper supplement (https://openreview.net/forum?id=2doqt9r0r0)
Supplement: supplementary_material [file attachment]

---

# Efficient Online Clustering with Moving Costs

---

Anonymous Author(s)

Affiliation

Address

email

## Abstract

In this work we consider an online learning problem, called *Online  $k$ -Clustering with Moving Costs*, at which a *learner* maintains a set of  $k$  facilities over  $T$  rounds so as to minimize the connection cost of an adversarially selected sequence of clients. The *learner* is informed on the positions of the clients at each round  $t$  only after its facility-selection and can use this information to update its decision in the next round. However, updating the facility positions comes with an additional moving cost based on the moving distance of the facilities. We present the first  $\mathcal{O}(\log n)$ -regret polynomial-time online learning algorithm guaranteeing that the overall cost (connection + moving) is at most  $\mathcal{O}(\log n)$  times the time-averaged connection cost of the *best fixed solution*. Our work improves on the recent result of Fotakis et al. [30] establishing  $\mathcal{O}(k)$ -regret guarantees *only* on the connection cost.

## 1 Introduction

Due to their various applications in diverse fields (e.g. machine learning, operational research, data science etc.), *clustering problems* have been extensively studied. In the well-studied  $k$ -median problem, given a set of clients,  $k$  facilities should be placed on a metric with the objective to minimize the sum of the distance of each client from its closest center [54, 14, 13, 66, 6, 43, 51, 64, 50, 15, 53, 3].

In many modern applications (e.g., epidemiology, social media, conference, etc.) the positions of the clients are not *static* but rather *evolve over time* [56, 55, 63, 58, 23, 5]. For example the geographic distribution of the clients of an online store or the distribution of Covid-19 cases may drastically change from year to year or respectively from day to day [30]. In such settings it is desirable to update/change the positions of the facilities (e.g., compositions of warehouses or Covid test-units) so as to better serve the time-evolving trajectory of the clients.

The clients' positions may change in complex and unpredictable ways and thus an *a priori knowledge* on their trajectory is not always available. Motivated by this, a recent line of research studies clustering problems under the *online learning framework* by assuming that the sequence of clients' positions is *unknown* and *adversarially selected* [18, 28, 16, 30]. More precisely, a *learner* must place  $k$  facilities at each round  $t \geq 1$  without knowing the positions of clients at round  $t$  which are revealed to the learner only after its facility-selection. The learner can use this information to update its decision in the next round; however, moving a facility comes with an additional moving cost that should be taken into account in the learner's updating decision, e.g. moving Covid-19 test-units comes with a cost [18, 28].

Building on this line of works, we consider the following online learning problem:

**Problem 1** (*Online  $k$ -Clustering with Moving Costs*). Let  $G(V, E, w)$  be a weighted graph with  $|V| = n$  vertices and  $k$  facilities. At each round  $t = 1, \dots, T$ :

1. The learner selects  $F_t \subseteq V$ , with  $|F_t| = k$ , at which facilities are placed.
2. The adversary selects the clients' positions,  $R_t \subseteq V$ .

### 3. The learner learns the clients' positions $R_t$ and suffers

$$\text{cost} = \sum_{j \in R_t} \underbrace{\min_{i \in F_t} d_G(j, i)}_{\text{connection cost of client } j} + \underbrace{\gamma \cdot M_G(F_{t-1}, F_t)}_{\text{moving cost of facilities}}$$

where  $d_G(j, i)$  is the distance between vertices  $i, j \in V$ ;  $M_G(F_{t-1}, F_t)$  is the minimum overall distance required to move  $k$  facilities from  $F_{t-1}$  to  $F_t$ ; and  $\gamma \geq 0$  is the facility-weight.

An online learning algorithm for Problem 1 tries to minimize the overall (connection + moving) cost by placing  $k$  facilities at each round  $t \geq 1$  based only on the previous positions of clients  $R_1, \dots, R_{t-1}$ . To the best of our knowledge, Problem 1 was first introduced in [18]<sup>1</sup>. If for any sequence of clients, the overall cost of the algorithm is at most  $\alpha$  times the overall connection cost of the optimal fixed placement of facilities  $F^*$  then the algorithm is called  $\alpha$ -regret, while in the special case of  $\alpha = 1$  the algorithm is additionally called *no-regret*.

Problem 1 comes as a special case of the well-studied *Metrical Task System* by considering each of the possible  $\binom{n}{k}$  facility placements as a different state. In their seminal work, [11] guarantee that the famous *Multiplicative Weights Update algorithm* (MWU) achieves  $(1 + \epsilon)$ -regret in Problem 1 for any  $\epsilon > 0$ . Unfortunately, running the MWU algorithm for Problem 1 is not really an option since it requires  $\mathcal{O}(n^k)$  time and space complexity. As a result, the following question naturally arises:

**Q.** Can we achieve  $\alpha$ -regret for Problem 1 with polynomial-time online learning algorithms?

Answering the above question is a challenging task. Even in the very simple scenario of time-invariant clients, i.e.  $R_t = R$  for all  $t \geq 1$ , an  $\alpha$ -regret online learning algorithm must essentially compute an  $\alpha$ -approximate solution of the  $k$ -median problem. Unfortunately the  $k$ -median problem cannot be approximated with ratio  $\alpha < 1 + 2/e \simeq 1.71$  (unless  $\text{NP} \subseteq \text{DTIME}[n^{\log \log n}]$  [42]) which excludes the existence of an  $(1 + 2/e)$ -regret polynomial-time online learning algorithm for Problem 1. Despite the fact that many  $\mathcal{O}(1)$ -approximation algorithms have been proposed for the  $k$ -median problem (the best current ratio is  $1 + \sqrt{3}$  [53]), these algorithms crucially rely on the (offline) knowledge of the whole sequence of clients and most importantly are not designed to handle the moving cost of the facilities [54, 14, 13, 66, 6, 43, 51, 64, 50, 15, 53, 3].

In their recent work, Fotakis et al. [30] propose an  $\mathcal{O}(k)$ -regret polynomial-time online learning algorithm for Problem 1 *without* moving costs (i.e. the special case of  $\gamma = 0$ ). Their approach is based on designing a *no-regret* polynomial-time algorithm for a *fractional relaxation* of Problem 1 and then using an *online client-oblivious* rounding scheme in order to convert a fractional solution to an integral one. Their analysis is based on the fact that the connection cost of *any possible client* is at most  $\mathcal{O}(k)$  times its fractional connection cost. However in order to establish the latter guarantee their rounding scheme performs abrupt changes on the facilities leading to huge moving cost.

**Our Contribution and Techniques.** In this work, we provide a positive answer to question (Q), by designing the first polynomial-time online learning algorithm for Online  $k$ -Clustering with Moving Costs that achieves  $\mathcal{O}(\log n)$ -regret for any  $\gamma \geq 0$ . The cornerstone idea of our work was to realize that  $\mathcal{O}(1)$ -regret can be established with a polynomial-time online learning algorithm in the special case of  $G$  being a Hierarchical Separation Tree (HST). Then, by using the standard metric embedding result of [25], we can easily convert such an algorithm to an  $\mathcal{O}(\log n)$ -regret algorithm for general graphs. Our approach for HSTs consists of two main technical steps:

1. We introduce a fractional relaxation of Problem 1 for HSTs. We then consider a specific regularizer on the fractional facility placements, called *Dilated Entropic Regularizer* [26], that takes into account the specific structure of the HST. Our first technical contribution is to establish that the famous *Follow the Leader algorithm* [34] with dilated entropic regularization admits  $\mathcal{O}(1)$ -regret for any  $\gamma \geq 0$ .
2. Our second technical contribution is the design of a novel *online client-oblivious* rounding scheme, called *Cut&Round*, that converts a fractional solution for HSTs into an integral one. By exploiting the specific HST structure we establish that *Cut&Round*, despite not

<sup>1</sup>In [18], an easier version of Problem 1 with 1-lookahead is considered, meaning that the learner learns the positions of the clients  $R_t$  before selecting  $F_t$ . Moreover,  $G$  is considered to be the line graph and  $\gamma = 1$ .

84 knowing the clients' positions  $R_t$ , simultaneously guarantees that (i) the connection cost of  
 85 each client  $j \in R_t$  is upper bounded by its fractional connection cost, and (ii) the expected  
 86 moving cost of the facilities is at most  $\mathcal{O}(1)$  times the fractional moving cost.

87 **Experimental Evaluation.** In Section F of the Appendix we experimentally compare our algorithm  
 88 with the algorithm of Fotakis et al. [30]. Our experiments verify that our algorithm is robust to  
 89 increases of the facility weight  $\gamma$  while the algorithm of [30] presents a significant cost increase.  
 90 We additionally experimentally evaluate our algorithm in the MNIST and CIFAR10 datasets. Our  
 91 experimental evaluations suggest that the  $\mathcal{O}(\log n)$ -regret bound is a pessimistic upper bound and  
 92 that in practise our algorithm performs significantly better.

93 **Related Work.** As already mentioned, our work most closely relates with the work of Fotakis et al.  
 94 [30] that provides an  $\mathcal{O}(k)$ -regret algorithm running in polynomial-time for  $\gamma = 0$ . [16] also consider  
 95 Problem 1 for  $\gamma = 0$  with the difference that the connection cost of clients is captured through the  
 96  $k$ -means objective i.e. the sum of the squared distances. They provide an  $(1 + \epsilon)$ -regret algorithm  
 97 with  $\mathcal{O}((k^2/\epsilon^2)^{2k})$  time-complexity that is still exponential in  $k$ . [18, 28] study the special case  
 98 of Problem 1 in which  $G$  is the line graph and  $\gamma = 1$  while assuming 1-lookahead on the request  
 99  $R_t$ . For  $k = 1$ , [18] provide an  $(1 + \epsilon)$ -competitive online algorithm meaning that its cost is at  
 100 most  $(1 + \epsilon)$  times the cost of the *optimal dynamic solution* and directly implies  $(1 + \epsilon)$ -regret. [28]  
 101 extended the previous result by providing a 63-competitive algorithm for  $k = 2$  on line graphs. Our  
 102 work also relates with the works of [23] and [4] that study offline approximation algorithms for  
 103 clustering problems with *time-evolving metrics*. Finally our work is closely related with the research  
 104 line of online learning in combinatorial domains and other settings of online clustering. Due to space  
 105 limitations, we resume this discussion in Section A of the Appendix.

## 106 2 Preliminaries and Our Results

107 Let  $G(V, E, w)$  be a weighted undirected graph where  $V$  denotes the set of vertices and  $E$  the set  
 108 of edges among them. The weight  $w_e$  of an edge  $e = (i, j) \in E$  denotes the cost of traversing  $e$ .  
 109 Without loss, we assume that  $w_e \in \mathbb{N}$  and  $w_e \geq 1$  for all edges  $e \in E$ . The *distance* between vertices  
 110  $i, j \in V$  is denoted with  $d_G(i, j)$  and equals the cost of the minimum cost path from  $i \in V$  to  $j \in V$ .  
 111 We use  $n := |V|$  to denote the cardinality of  $G$  and  $D_G := \max_{i, j \in V} d_G(i, j)$  to denote its diameter.

112 Given a placement of facilities  $F \subseteq V$ , with  $|F| = k$ , a client placed at vertex  $j \in V$  connects to the  
 113 *closest open facility*  $i \in F$ . This is formally captured in Definition 1.

114 **Definition 1.** The connection cost of a set of clients  $R \subseteq V$  under the facility-placement  $F \subseteq V$  with  
 115  $|F| = k$  equals

$$C_R(F) := \sum_{j \in R} \min_{i \in F} d_G(j, i)$$

116 Next, consider any pair of facility-placements  $F, F' \subseteq V$  such that  $|F| = |F'| = k$ . The moving  
 117 distance between  $F$  and  $F'$  is the minimum overall distance needed to transfer the  $k$  facilities from  $F$   
 118 to  $F'$ , formally defined in Definition 2.

119 **Definition 2.** Fix any facility-placements  $F, F' \subseteq V$  where  $|F| = |F'| = k$ . Let  $\Sigma$  be the set of  
 120 all possible matchings from  $F$  to  $F'$ , i.e. each  $\sigma \in \Sigma$  is a one-to-one mapping  $\sigma : F \mapsto F'$  with  
 121  $\sigma(i) \in F'$  denoting the mapping of facility  $i \in F$ . The moving cost between  $F$  and  $F'$  equals

$$M_G(F, F') := \min_{\sigma \in \Sigma} \sum_{i \in F} d_G(i, \sigma(i))$$

122 At each round  $t \geq 1$ , an online learning algorithm  $\mathcal{A}$  for Problem 1 takes as input all the *previous*  
 123 positions of the clients  $R_1, \dots, R_{t-1} \subseteq V$  and outputs a facility-placement  $F_t := \mathcal{A}(R_1, \dots, R_{t-1})$   
 124 such that  $F_t \subseteq V$  and  $|F_t| = k$ . The performance of an online learning algorithm is measured by the  
 125 notion of *regret*, which we formally introduce in Definition 3.

126 **Definition 3.** An online learning algorithm  $\mathcal{A}$  for Problem 1 is called  $\alpha$ -regret with additive regret  $\beta$   
 127 if and only if for any sequence of clients  $R_1, \dots, R_T \subseteq V$ ,

$$\mathbb{E} \left[ \sum_{t=1}^T C_{R_t}(F_t) + \gamma \cdot \sum_{t=2}^T M_G(F_{t-1}, F_t) \right] \leq \alpha \cdot \min_{|F^*|=k} \sum_{t=1}^T C_{R_t}(F^*) + \beta \cdot \sqrt{T}$$

128 where  $F_t = \mathcal{A}(R_1, \dots, R_{t-1})$  and  $\alpha, \beta$  are constants independent of  $T$ .

129 An online learning algorithm  $\mathcal{A}$  selects the positions of the  $k$  facilities at each round  $t \geq 1$  solely  
 130 based on the positions of the clients in the previous rounds,  $R_1, \dots, R_{t-1}$ . If  $\mathcal{A}$  is  $\alpha$ -regret then  
 131 Definition 3 implies that its time-averaged overall cost (connection + moving cost) is at most  $\alpha$   
 132 times the time-averaged cost of the *optimal static solution*! <sup>2</sup> Furthermore, the dependency on  $\sqrt{T}$  is  
 133 known to be optimal [11] and  $\beta$  is typically only required to be polynomially bounded by the size of  
 134 the input, as for  $T \rightarrow \infty$  the corresponding term in the time-averaged cost vanishes.

135 As already mentioned, the seminal work of [11] implies the existence of an  $(1 + \epsilon)$ -regret algorithm  
 136 for Problem 1; however, this algorithm requires  $\mathcal{O}(n^k)$  time and space complexity. Prior to this work,  
 137 the only polynomial time online learning algorithm for Problem 1 was due to Fotakis et al. [30], for  
 138 the special case of  $\gamma = 0$ . Specifically, in their work the authors design an online learning algorithm  
 139 with the following guarantee:

140 **Theorem** (Fotakis et al. [30]). *There exists a randomized online learning algorithm for Problem 1*  
 141 *that runs in polynomial time (w.r.t.  $T$ ,  $n$  and  $\log D_G$ ) such that*

$$\mathbb{E} \left[ \sum_{t=1}^T C_{R_t}(F_t) \right] \leq \mathcal{O}(k) \cdot \min_{|F^*|=k} \sum_{t=1}^T C_{R_t}(F^*) + \mathcal{O}(k \cdot n \cdot \sqrt{\log n} \cdot D_G) \cdot \sqrt{T}$$

142 Clearly, the algorithm of [30] has not been designed to account for charging the moving of facilities,  
 143 as indicated by the absence of the moving cost in the above regret guarantee. The main contribution  
 144 of this work is to obtain (for the first time) regret guarantees that also account for the moving cost.

145 **Theorem 1.** *There exists a randomized online learning algorithm for Problem 1 (Algorithm 2) that*  
 146 *runs in polynomial time (w.r.t.  $T$ ,  $n$  and  $\log D_G$ ) and admits the following regret guarantee:*

$$\mathbb{E} \left[ \sum_{t=1}^T C_{R_t}(F_t) + \gamma \cdot \sum_{t=2}^T M_G(F_{t-1}, F_t) \right] \leq \mathcal{O}(\log n) \cdot \min_{|F^*|=k} \sum_{t=1}^T C_{R_t}(F^*) + \beta \cdot \sqrt{T}$$

147 for  $\beta = \mathcal{O}(k \cdot n^{3/2} \cdot D_G \cdot \max(\gamma, 1))$  and any  $\gamma \geq 0$ .

148 **Remark 1.** *We remark that while our additive regret  $\beta$  is larger than the corresponding term in [30]*  
 149 *by a factor of  $\mathcal{O}(\sqrt{n})$ , our results apply to any  $\gamma \geq 0$  while the algorithm of [30] can generally suffer*  
 150 *unbounded moving cost for  $\gamma \rightarrow \infty$ , as our experimental results verify.*

## 151 2.1 HSTs and Metric Embeddings

152 In this section we provide some preliminary introduction to Hierarchical Separation Trees (HSTs),  
 153 as they consist a key technical tool towards proving Theorem 1. A *weighted tree*  $\mathcal{T}(V, E, w)$  is a  
 154 weighted graph with no cycles. Equivalently, for any pair of vertices  $i, j \in V$  there exists a unique  
 155 path that connects them. In Definition 4, we establish some basic notation for tree graphs.

156 **Definition 4.** *Fix any tree  $\mathcal{T}(V, E, w)$ . For every vertex  $u \in V$ ,  $\text{cld}(u) \subseteq V$  denotes the set children*  
 157 *vertices of  $u$  and  $p(u)$  denotes its unique parent, i.e.  $u \in \text{cld}(p(u))$ . The root  $r \in V$  of  $\mathcal{T}$  is the*  
 158 *unique node with  $p(r) = \emptyset$  and the set  $L(\mathcal{T}) := \{u \in V : \text{cld}(u) = \emptyset\}$  denotes the leaves of  $\mathcal{T}$ .*  
 159 *We use  $\text{dpt}(u)$  to denote the depth of a vertex  $u \in V$ , i.e. the length of the (unique) path from the root*  
 160  *$r$  to  $u$ , and  $h(\mathcal{T}) := \max_{u \in L(\mathcal{T})} \text{dpt}(u)$  to denote the height of  $\mathcal{T}$ . We use  $\text{lev}(u) := h(\mathcal{T}) - \text{dpt}(u)$*   
 161 *to denote the level of a vertex  $u \in V$ . Finally,  $T(u) \subseteq V$  denotes the set of vertices on the sub-tree*  
 162 *rooted at  $u$ , i.e. the set of vertices that are descendants of  $u$ .*

163 Next, we proceed to define a family of well-structured tree graphs that constitute one of the primary  
 164 technical tools used in our analysis.

165 **Definition 5.** *A Hierarchical Separation Tree (HST) is a weighted tree  $\mathcal{T}(V, E, w)$  such that (i) for*  
 166 *any node  $u$  and any of its children  $v \in \text{cld}(u)$ , the edge  $e = (u, v)$  admits weight  $w_e = 2^{\text{lev}(v)}$ , and*  
 167 *(ii) the tree is balanced, namely  $\text{lev}(u) = 0$  for all leaves  $u \in L(\mathcal{T})$ .*

168 In their seminal works, [10] and later [24] showed that HSTs can approximately preserve the distances  
 169 of any graph  $G(V, E, w)$  within some logarithmic level of distortion.

<sup>2</sup>Specifically, the time-averaged overall cost of  $\mathcal{A}$  approaches this upper bound with rate  $\beta \cdot T^{-1/2}$ .

170 **Theorem 2.** For any graph  $G(V, E, w)$  with  $|V| = n$  and diameter  $D$ , there exists a polynomial-time  
 171 randomized algorithm that given as input  $G$  produces an HST  $\mathcal{T}$  with height  $h(\mathcal{T}) \leq \lceil \log D \rceil$  s.t.

172 1.  $L(\mathcal{T}) = V$ , meaning that the leaves of  $\mathcal{T}$  correspond to the vertices of  $G$ .

173 2. For any  $u, v \in V$ ,  $d_G(u, v) \leq d_{\mathcal{T}}(u, v)$  and  $\mathbb{E}[d_{\mathcal{T}}(u, v)] \leq \mathcal{O}(\log n) \cdot d_G(u, v)$ .

174 Theorem 2 states that any weighted graph  $G(V, E, w)$  can be embedded into an HST  $\mathcal{T}$  with  
 175  $\mathcal{O}(\log n)$ -distortion. This means that the distance  $d_G(u, v)$  between any pair of vertices  $u, v \in V$  can  
 176 be approximated by their respective distance  $d_{\mathcal{T}}(u, v)$  in  $\mathcal{T}$  within an (expected) factor of  $\mathcal{O}(\log n)$ .

177 **Remark 2.** We note that traditionally HSTs are neither balanced nor are required to have weights  
 178 that are specifically powers of 2. However, we can transform any general HST into our specific  
 179 definition, and this has been accounted for in the statement of the above theorem. The details are  
 180 deferred to Section B of the Appendix.

### 181 3 Overview of our approach

182 In this section we present the key steps of our approach towards designing the  $\mathcal{O}(\log n)$ -regret online  
 183 learning algorithm for Problem 1. Our approach can be summarized in the following three pillars:

- 184 1. In Section 3.1 we introduce a *fractional relaxation* of Problem 1 in the special case of HSTs  
 185 (Problem 2). Problem 2 is an artificial problem at which the learner can place a *fractional*  
 186 *amount of facility* to the leaves of an HST so as to fractionally serve the arrived clients.  
 187 Since the *optimal static solution* of Problem 2 lower bounds the *optimal static solution*  
 188 of Problem 1 in the special case of HSTs, the first step of our approach is to design an  
 189  $\mathcal{O}(1)$ -regret algorithm for Problem 2.
- 190 2. In Section 3.2 we present the formal guarantees of a novel randomized rounding scheme,  
 191 called Cut&Round, that is client-oblivious and converts any *fractional solution* for Prob-  
 192 lem 2 into an actual placement of  $k$  facilities on the leaves of the HST with just an  $\mathcal{O}(1)$ -  
 193 overhead in the connection and the moving cost.
- 194 3. In Section 3.3 we present how the *fractional algorithm* for Problem 2 together with the  
 195 Cut&Round rounding naturally lead to an  $\mathcal{O}(1)$ -regret online learning algorithm for Prob-  
 196 lem 1 in the special case of HSTs (Algorithm 1). Our main algorithm, presented in Algo-  
 197 rithm 2, then consists of running Algorithm 1 into an  $\mathcal{O}(\log n)$  HST embedding of input  
 198 graph.

#### 199 3.1 A Fractional Relaxation for HSTs

200 In this section we introduce a fractional relaxation for Problem 1, called *Fractional  $k$ -Clustering with*  
 201 *Moving Costs on HSTs* (Problem 2). Fix any HST  $\mathcal{T}(V, E, w)$  (in this section,  $V$  denotes the nodes  
 202 of the HST). We begin by presenting a *fractional extension* of placing  $k$  facilities on the leaves of  $\mathcal{T}$ .

203 **Definition 6.** The set of fractional facility placements  $\mathcal{FP}(\mathcal{T})$  consists of all vectors  $y \in \mathbb{R}^{|V|}$  such  
 204 that

- 205 1.  $y_v \in [0, 1]$  for all leaves  $v \in L(\mathcal{T})$ .
- 206 2.  $y_v = \sum_{u \in \text{cld}(v)} y_u$  for all non-leaves  $v \notin L(\mathcal{T})$ .
- 207 3.  $\sum_{v \in L(\mathcal{T})} y_v = k$ , i.e. the total amount of facility on the leaves equals  $k$ .

208 For a leaf vertex  $v \in L(\mathcal{T})$ ,  $y_v$  simply denotes the fractional amount of facilities that are placed on it.  
 209 For all non-leaf vertices  $v \notin L(\mathcal{T})$ ,  $y_v$  denotes the total amount of facility placed in the leaves of the  
 210 sub-tree  $T(v)$ . Thus, any integral vector  $y \in \mathcal{FP}(\mathcal{T}) \cap \mathbb{N}$  corresponds to a placement of  $k$  facilities  
 211 on the leaves of  $\mathcal{T}$ .

212 In Definitions 7 and 8 we extend the notion of connection and moving cost for fractional facility  
 213 placements. In the special case of integral facility placements, Definitions 7 and 8 respectively  
 214 collapse to Definitions 1 and 2 (a formal proof is given in Claims 1 and 2 of Section C of the  
 215 Appendix).

216 **Definition 7.** The fractional connection cost of a set of clients  $R \subseteq L(\mathcal{T})$  under  $y \in \mathcal{FP}(\mathcal{T})$  is  
 217 defined as

$$f_R(y) := \sum_{j \in R} \sum_{v \in P(j, r)} 2^{\text{lev}(v)+1} \cdot \max(0, 1 - y_v)$$

218 where  $P(j, r)$  denotes the set of vertices in the (unique) path from the leaf  $j \in L(\mathcal{T})$  to the root  $r$ .

219 **Definition 8.** The fractional moving cost between any  $y, y' \in \mathcal{FP}(\mathcal{T})$  is defined as

$$\|y - y'\|_{\mathcal{T}} := \gamma \cdot \sum_{v \in V(\mathcal{T})} 2^{\text{lev}(v)} \cdot |y_v - y'_v|$$

220 We are now ready to present our fractional generalization of Problem 1 in the special case of HSTs.

221 **Problem 2** (Fractional  $k$ -Clustering with Moving Costs on HSTs). Fix any HST  $\mathcal{T}$ . At each round  
 222  $t = 1, \dots, T$ :

- 223 1. The learner selects a vector  $y^t \in \mathcal{FP}(\mathcal{T})$ .
- 224 2. The adversary selects a set of clients  $R_t \subseteq L(\mathcal{T})$ .
- 225 3. The learner suffers cost  $f_{R_t}(y^t) + \|y^t - y^{t-1}\|_{\mathcal{T}}$ .

226 In Section 4, we develop and present an  $\mathcal{O}(1)$ -regret algorithm for Problem 2 (see Algorithm 3). To  
 227 this end, we present its formal regret guarantee established in Theorem 3.

228 **Theorem 3.** There exists a polynomial-time online learning algorithm for Problem 2 (Algorithm 3),  
 229 such that for any sequence  $R_1, \dots, R_T \subseteq L(\mathcal{T})$ , its output  $y^1, \dots, y^T$  satisfies

$$\sum_{t=1}^T f_{R_t}(y^t) + \sum_{t=2}^T \|y^t - y^{t-1}\|_{\mathcal{T}} \leq \frac{3}{2} \cdot \min_{y^* \in \mathcal{FP}(\mathcal{T})} \sum_{t=1}^T f_{R_t}(y^*) + \beta \cdot \sqrt{T}$$

230 for  $\beta = \mathcal{O}(k \cdot |L(\mathcal{T})|^{3/2} \cdot D_{\mathcal{T}} \cdot \max(\gamma, 1))$ .

### 231 3.2 From Fractional to Integral Placements in HSTs

232 As already mentioned, the basic idea of our approach is to convert at each round  $t \geq 1$  the fractional  
 233 placement  $y^t \in \mathcal{FP}(\mathcal{T})$  produced by Algorithm 3 into an integral facility placement  $F_t \subseteq L(\mathcal{T})$   
 234 with  $|F_t| = k$  on the leaves of the HST. In order to guarantee small regret, our rounding scheme  
 235 should preserve both the connection and the moving cost of the fractional solution within constant  
 236 factors for any possible set of arriving clients. In order to guarantee the latter, our rounding scheme  
 237 Cut&Round (Algorithm 4) uses shared randomness across different rounds. Cut&Round is rather  
 238 complicated and is presented in Section 5. To this end, we present its formal guarantee.

239 **Theorem 4.** There exists a linear-time deterministic algorithm, called Cut&Round (Algorithm 4),  
 240 that takes as input an HST  $\mathcal{T}$ , a fractional facility placement  $y \in \mathcal{FP}(\mathcal{T})$  and a vector  $\alpha \in [0, 1]^{|V|}$   
 241 and outputs a placement of  $k$  facilities  $F \leftarrow \text{Cut\&Round}(\mathcal{T}, y, \alpha)$  on the leaves of  $\mathcal{T}$  ( $F \subseteq L(\mathcal{T})$ )  
 242 and  $|F| = k$ ) such that

- 243 1.  $\mathbb{E}_{\alpha \sim \text{Unif}(0,1)} [C_R(F)] = f_R(y)$  for all client requests  $R \subseteq L(\mathcal{T})$ .
- 244 2.  $\mathbb{E}_{\alpha \sim \text{Unif}(0,1)} [\gamma \cdot M_{\mathcal{T}}(F, F')] \leq 4 \cdot \|y - y'\|_{\mathcal{T}}$  for all other fractional facility placements  
 245  $y' \in \mathcal{FP}(\mathcal{T})$  and  $F' \leftarrow \text{Cut\&Round}(\mathcal{T}, y', \alpha)$ .

246 Item 1 of Theorem 4 establishes that although Cut&Round is oblivious to the arrived set of clients  
 247  $R_t \subseteq L(\mathcal{T})$ , the expected connection cost of the output equals the fractional connection cost under  
 248  $y^t \in \mathcal{FP}(\mathcal{T})$ . Item 2 of Theorem 4 states that once the same random seed  $\alpha$  is used into two  
 249 consecutive time steps, then the expected moving cost between the facility-placements  $F_t$  and  $F_{t+1}$   
 250 is at most  $\mathcal{O}(1)$ -times the fractional moving cost between  $y^t$  and  $y^{t+1}$ . Both properties crucially rely  
 251 on the structure of the HST and consist one of the main technical contributions of our work.

### 3.3 Overall Online Learning Algorithm

We are now ready to formally introduce our main algorithm (Algorithm 2) and prove Theorem 1. First, we combine the algorithms from Theorems 3 and 4 to design an  $\mathcal{O}(1)$ -regret algorithm for Problem 1 on HSTs (Algorithm 1). Up next we present how Algorithm 1 can be converted into an  $\mathcal{O}(\log n)$ -regret online learning algorithm for general graphs, using the metric embedding technique of Theorem 2, resulting to our final algorithm (Algorithm 2).

---

#### Algorithm 1 $\mathcal{O}(1)$ -regret for HSTs.

---

- 1: **Input:** A sequence  $R_1, \dots, R_T \subseteq L(\mathcal{T})$ .
  - 2: The learner samples  $\alpha_v \sim \text{Unif}(0, 1)$  for all  $v \in V(\mathcal{T})$ .
  - 3: **for** each round  $t = 1$  **to**  $T$  **do**
  - 4: The learner places the  $k$  facilities to the leaves of the HST  $\mathcal{T}$  based on the output  $F_t := \text{Cut\&Round}(\mathcal{T}, y^t, \alpha)$ .
  - 5: The learner learns  $R_t \subseteq L(\mathcal{T})$ .
  - 6: The learner updates  $y^{t+1} \in \mathcal{FP}(\mathcal{T})$  by running Algorithm 3 for Problem 2 with input  $R_1, \dots, R_t$ .
  - 7: **end for**
- 

---

#### Algorithm 2 $\mathcal{O}(\log n)$ -regret for graphs.

---

- 1: **Input:** A sequence  $R_1, \dots, R_T \subseteq L(\mathcal{T})$ .
  - 2: The learner embeds  $G(V, E, w)$  into a (random) HST  $\mathcal{T}$  with  $L(\mathcal{T}) = V$  via the procedure of Theorem 2.
  - 3: **for** each round  $t = 1$  **to**  $T$  **do**
  - 4: The learner selects a facility-placement  $F_t \subseteq V$ .
  - 5: The learner learns  $R_t \subseteq V$ .
  - 6: The learner updates  $F_{t+1}$  by giving as input  $R_1, \dots, R_t \subseteq L(\mathcal{T})$  to Algorithm 1 for  $\mathcal{T}$ .
  - 7: **end for**
- 

**Theorem 5.** *For any sequence of client requests  $R_1, \dots, R_T \subseteq L(\mathcal{T})$ , the sequence of facility-placements  $F_1, \dots, F_T \subseteq L(\mathcal{T})$  produced by Algorithm 1 satisfies*

$$\mathbb{E} \left[ \sum_{t=1}^T C_{R_t}(F_t) + \gamma \cdot \sum_{t=2}^T M_{\mathcal{T}}(F_t, F_{t-1}) \right] \leq 6 \cdot \min_{|F^*|=k} \sum_{t=1}^T C_{R_t}(F^*) + \beta \cdot \sqrt{T}$$

for  $\beta = \mathcal{O}(k \cdot |L(\mathcal{T})|^{3/2} \cdot D_{\mathcal{T}} \cdot \max(\gamma, 1))$ .

Theorem 5 establishes that Algorithm 1 achieves constant regret in the special case of HSTs and its proof easily follows by Theorems 3 and 4. Then, the proof of Theorem 1 easily follows by Theorem 2 and Theorem 5. All the proofs are deferred to Section C of the Appendix.

### 4 $\mathcal{O}(1)$ -Regret for Fractional HST Clustering

In this section we present the  $\mathcal{O}(1)$ -regret algorithm for Problem 2, described in Algorithm 3, and exhibit the key ideas in establishing Theorem 3. Without loss of generality, we can assume that the facility-weight satisfies  $\gamma \geq 1^3$ .

Algorithm 3 is the well-known online learning algorithm *Follow the Regularized Leader* (FTRL) with a specific regularizer  $R_{\mathcal{T}}(\cdot)$  presented in Definition 9. Our results crucially rely on the properties of this regularizer since it takes into account the HST structure and permits us to bound the fractional moving cost of FTRL.

**Definition 9.** *Given an HST  $\mathcal{T}$ , the dilated entropic regularizer  $R_{\mathcal{T}}(y)$  over  $y \in \mathcal{FP}(\mathcal{T})$  is defined as*

$$R_{\mathcal{T}}(y) := \sum_{v \neq r} 2^{\text{lev}(v)} \cdot (y_v + \delta_v) \cdot \ln \left( \frac{y_v + \delta_v}{y_{p(v)} + \delta_{p(v)}} \right)$$

where  $\delta_v := (k/n) \cdot |L(\mathcal{T}) \cap T(v)|$  and  $n := |L(\mathcal{T})|$ .

Algorithm 3 selects at each step  $t$  the facility placement  $y^t \in \mathcal{FP}(\mathcal{T})$  that minimizes a convex combination of the total fractional connection cost for the sub-sequence  $R_1, \dots, R_{t-1}$  and  $R_{\mathcal{T}}(y)$ . The regularization term ensures the stability of the output, which will result in a bounded fractional moving cost.

---

<sup>3</sup>If not, establishing our guarantees for  $\gamma = 1$  will clearly upper bound the actual moving cost.

---

**Algorithm 3** FTRL with dilated entropic regularization

---

- 1: **Input:** An adversarial sequence  $R_1, \dots, R_T \subseteq L(\mathcal{T})$ .
  - 2: **for**  $t = 1$  **to**  $T$  **do**
  - 3:   The learner selects  $y^t \in \mathcal{FP}(\mathcal{T})$ .
  - 4:   The learner suffers cost  $f_{R_t}(y^t) + \|y^t - y^{t-1}\|_{\mathcal{T}}$ .
  - 5:   The learner updates  $y^{t+1} \leftarrow \arg \min_{y \in \mathcal{FP}(\mathcal{T})} \left[ \sum_{s=1}^t f_{R_s}(y) + (\gamma\sqrt{nT}) \cdot R_{\mathcal{T}}(y) \right]$ .
  - 6: **end for**
- 

**Analysis of Algorithm 3.** Due to space limitations, all proofs are moved to Section D of the Appendix. The primary reason for the specific selection of the regularizer at Definition 9 is that  $R_{\mathcal{T}}(\cdot)$  is strongly convex with respect to the norm  $\|\cdot\|_{\mathcal{T}}$  of Definition 8, as established in Lemma 1 which is the main technical contribution of the section. We use  $D = D_{\mathcal{T}}$  for the diameter of  $\mathcal{T}$ .

**Lemma 1.** For any vectors  $y, y' \in \mathcal{FP}(\mathcal{T})$ ,

$$R_{\mathcal{T}}(y') \geq R_{\mathcal{T}}(y) + \langle \nabla R_{\mathcal{T}}(y), y' - y \rangle + (8kD\gamma^2)^{-1} \cdot \|y - y'\|_{\mathcal{T}}^2$$

The strong convexity of  $R_{\mathcal{T}}(y)$  with respect to  $\|\cdot\|_{\mathcal{T}}$  is crucial since it permits us to bound the moving cost of Algorithm 3 by its fractional connection cost.

**Lemma 2.** For any sequence  $R_1, \dots, R_T \subseteq L(\mathcal{T})$ , the output of Algorithm 3 satisfies

$$\sum_{t=2}^T \|y^t - y^{t-1}\|_{\mathcal{T}} \leq \frac{1}{2} \cdot \sum_{t=1}^T f_{R_t}(y^t) + \mathcal{O}(\gamma k D) \cdot \sqrt{T}$$

We remark that using another regularizer  $R(\cdot)$  that is strongly convex with respect to another norm  $\|\cdot\|$  would still imply Lemma 1 with respect to  $\|\cdot\|$ . The problem though is that the *fractional moving cost*  $\sum_{t=1}^T \|y_t - y_{t-1}\|$  can no longer be associated with the actual moving cost  $\sum_{t=1}^T M_{\mathcal{T}}(F_t, F_{t-1})$ . It is for this reason that using a regularizer that is strongly convex with respect to  $\|\cdot\|_{\mathcal{T}}$  is crucial.

Next, by adapting the standard analysis of FTRL to our specific setting, we derive Lemma 3 establishing that Algorithm 3 admits bounded connection cost.

**Lemma 3.** For any sequence  $R_1, \dots, R_T \subseteq L(\mathcal{T})$ , the output of Algorithm 3 satisfies

$$\sum_{t=1}^T f_{R_t}(y^t) \leq \min_{y^* \in \mathcal{FP}} \sum_{t=1}^T f_{R_t}(y^*) + \mathcal{O}(kn^{3/2}D\gamma) \cdot \sqrt{T}$$

The proof of Theorem 3 directly follows by Lemma 2 and 3. We conclude the section by presenting how Step 5 of Algorithm 3 can be efficiently implemented, namely

$$\min_{y \in \mathcal{FP}(\mathcal{T})} \Phi_t(y) := \sum_{s=1}^t f_{R_s}(y) + (\gamma\sqrt{nT}) \cdot R_{\mathcal{T}}(y).$$

Since  $\Phi_t(y)$  is strongly convex and the set  $\mathcal{FP}(\mathcal{T})$  is a polytope, one could use standard optimization algorithms such as the *ellipsoid method* or *projected gradient descent* to approximately minimize  $\Phi_t(y)$  given access to a *sub-gradient oracle* for  $\Phi_t(\cdot)$ . In Claim 11 of Section D of the Appendix, we establish that the sub-gradients of  $\Phi(\cdot)$  can be computed in polynomial time and thus any of the previous methods can be used to approximately minimize  $\Phi(\cdot)$ . In Lemma 4 we establish the intuitive fact that approximately implementing Step 5 does not affect the guarantees of Theorem 3.

**Lemma 4.** Let  $y^t$  be the minimizer of  $\Phi_t(\cdot)$  in  $\mathcal{FP}(\mathcal{T})$  and let  $z^t \in \mathcal{FP}(\mathcal{T})$  be any point such that  $\Phi_t(z^t) \leq \Phi_t(y^t) + \epsilon$  for some  $\epsilon = \mathcal{O}(T^{-1/2})$ . Then,

$$f_{R_t}(z^t) + \|z^t - z^{t-1}\|_{\mathcal{T}} \leq f_{R_t}(y^t) + \|y^t - y^{t-1}\|_{\mathcal{T}} + \mathcal{O}(kn^{3/2}D\gamma) \cdot T^{-1/2}$$

**Remark 3.** In our implementation of the algorithm, we approximately solve Step 5 of Algorithm 3 via Mirror Descent based on the Bregman divergence of  $\mathcal{R}_{\mathcal{T}}(\cdot)$ . This admits the same convergence rates as projected gradient descent but the projection step can be computed in linear time with respect to the size of the HST  $\mathcal{T}$ . We present the details of our implementation in Section C of the Appendix.



## 5 The Cut&Round Rounding

In this section we present our novel rounding scheme (Algorithm Cut&Round) as well as the main steps that are required in order to establish Theorem 4. To ease notation, for any real number  $x \geq 0$  we denote its decimal part as  $\delta(x) = x - \lfloor x \rfloor$ .

---

### Algorithm 4 Cut&Round.

---

```

1: Input: An HST  $\mathcal{T}$ , a fractional placement
    $y \in \mathcal{FP}(\mathcal{T})$  and thresholds  $\alpha_v \in [0, 1]$  for
   all  $v \in V(\mathcal{T})$ .
2:  $Y_r \leftarrow k$ 
3: for levels  $\ell = h(\mathcal{T})$  to 1 do
4:   for all nodes  $v$  with  $lev(v) = \ell$  do
5:      $Y_{rem} \leftarrow Y_v$ 
6:      $y_{rem} \leftarrow y_v$ 
7:     for all children  $u \in \text{cld}(v)$  do
8:        $Y_u \leftarrow \text{Alloc}(y_u, Y_{rem}, y_{rem}, \alpha_u)$ 
9:        $Y_{rem} \leftarrow Y_{rem} - Y_u$ 
10:       $y_{rem} \leftarrow y_{rem} - y_u$ 
11:     end for
12:   end for
13: end for
14: return  $F := \{u \in L(\mathcal{T}) : Y_u = 1\}$ .
```

---



---

### Algorithm 5 Alloc.

---

```

Input: Numbers  $y_u, y_{rem} \geq 0, Y_{rem} \in \mathbb{N}$ 
and  $\alpha_u \in [0, 1]$ .
if  $Y_{rem} == \lfloor y_{rem} \rfloor$  then
  if  $\delta(y_u) < \delta(y_{rem})$  then
     $Y_u \leftarrow \lfloor y_u \rfloor$ 
  else
     $Y_u \leftarrow \lfloor y_u \rfloor + \mathbb{1} \left[ a_u \leq \frac{\delta(y_u) - \delta(y_{rem})}{1 - \delta(y_{rem})} \right]$ 
  end if
else
  if  $\delta(y_u) < \delta(y_{rem})$  then
     $Y_u \leftarrow \lfloor y_u \rfloor + \mathbb{1} \left[ a_u \leq \frac{\delta(y_u)}{\delta(y_{rem})} \right]$ 
  else
     $Y_u \leftarrow \lfloor y_u \rfloor + 1$ 
  end if
end if
Return  $Y_u$ .
```

---

On principle, Cut&Round (Algorithm 4) assigns to each vertex  $v$  an integer number of facilities  $Y_v$  to be placed at the leaves of its sub-tree. Notice that due to sub-routine Alloc (Algorithm 5),  $Y_v$  either equals  $\lfloor y_v \rfloor$  or  $\lfloor y_v \rfloor + 1$ . Cut&Round initially assigns  $k$  facilities to the set of leaves that descend from the root  $r$ , which is precisely  $L(\mathcal{T})$ . Then, it moves in decreasing level order to decide  $Y_v$  for each node  $v$ . Once  $Y_v$  is determined (Step 5), the  $Y_v$  facilities are allocated to the sub-trees of its children  $u \in \text{cld}(v)$  (Steps 7-10) via sub-routine Alloc using the thresholds  $\alpha_u$ , in a manner that guarantees that  $Y_v = \sum_{u \in \text{cld}(v)} Y_u$  (see Section E.1 of the Appendix). This implies the feasibility of Cut&Round, as exactly  $k$  facilities are placed in the leaves of  $\mathcal{T}$  at the end of the process.

Assuming that the set of thresholds  $\alpha_v$  is randomly drawn from the uniform distribution in  $[0, 1]$ , sub-routine Alloc (Algorithm 5) guarantees that  $Y_v$  either equals  $\lfloor y_v \rfloor$  or  $\lfloor y_v \rfloor + 1$  while  $\mathbb{E}_\alpha[Y_v] = y_v$ . This is formally captured in Lemma 5 and is crucial in the proof of Theorem 4.

**Lemma 5.** Consider Algorithm 4 given as input a vector  $y \in \mathcal{FP}(\mathcal{T})$  and random thresholds  $\alpha_v \sim \text{Unif}(0, 1)$ . Then,

$$Y_v = \begin{cases} \lfloor y_v \rfloor & \text{with probability } 1 - \delta(y_v) \\ \lfloor y_v \rfloor + 1 & \text{with probability } \delta(y_v) \end{cases}$$

By coupling Lemma 5 with the HST structure we are able to establish Theorem 4. The proof is technically involved and thus deferred to Section E of the Appendix.

## 6 Conclusion

In this work, we designed the first polynomial-time online learning algorithm for *Online  $k$ -Clustering with Moving Costs* that achieves  $\mathcal{O}(\log n)$ -regret with respect to the cost of the optimal *static* facility placement, extending the results of Fotakis et al. [30] for the special case of  $\gamma = 0$ . A interesting future direction is to investigate whether a polynomial-time online learning algorithm with  $\mathcal{O}(1)$ -regret for the problem is theoretically possible or not.

**Limitations:** Our current optimality guarantees are with respect to the optimal *static* facility placement. Going beyond the notion of regret, an intriguing future direction is establishing guarantees with respect to the *optimal dynamic facility-placement* that moves facilities from round to round by suffering the corresponding moving cost.

## References

- [1] Alekh Agarwal, Daniel J. Hsu, Satyen Kale, John Langford, Lihong Li, and Robert E. Schapire. Taming the monster: A fast and simple algorithm for contextual bandits. In *International Conference on Machine Learning*, 2014.
- [2] Nir Ailon. Improved bounds for online learning over the permutahedron and other ranking polytopes. In *Proceedings of the 17th International Conference on Artificial Intelligence and Statistics*, AISTATS 2014, 2014.
- [3] Soroush Alamdari and David B. Shmoys. A bicriteria approximation algorithm for the k-center and k-median problems. In *Workshop on Approximation and Online Algorithms*, 2017.
- [4] Hyung-Chan An, Ashkan Norouzi-Fard, and Ola Svensson. Dynamic facility location via exponential clocks. *ACM Trans. Algorithms*, 13(2):21:1–21:20, 2017.
- [5] Tarique Anwar, Surya Nepal, Cecile Paris, Jian Yang, Jia Wu, and Quan Z. Sheng. Tracking the evolution of clusters in social media streams. *IEEE Transactions on Big Data*, pages 1–15, 2022.
- [6] Vijay Arya, Naveen Garg, Rohit Khandekar, Adam Meyerson, Kamesh Munagala, and Vinayaka Pandit. Local search heuristic for k-median and facility location problems. In *Proceedings of the Thirty-Third Annual ACM Symposium on Theory of Computing*, STOC '01, page 21–29. Association for Computing Machinery, 2001.
- [7] Baruch Awerbuch and Robert Kleinberg. Online linear optimization and adaptive routing. *J. Comput. Syst. Sci.*, 2008.
- [8] Maria-Florina Balcan and Avrim Blum. Approximation algorithms and online mechanisms for item pricing. In *ACM Conference on Electronic Commerce*, 2006.
- [9] Nikhil Bansal, Niv Buchbinder, Aleksander Madry, and Joseph Naor. A polylogarithmic-competitive algorithm for the k-server problem. In Rafail Ostrovsky, editor, *IEEE 52nd Annual Symposium on Foundations of Computer Science, FOCS 2011, Palm Springs, CA, USA, October 22-25, 2011*, pages 267–276. IEEE Computer Society, 2011.
- [10] Yair Bartal. Probabilistic approximation of metric spaces and its algorithmic applications. *Proceedings of 37th Conference on Foundations of Computer Science*, pages 184–193, 1996.
- [11] Avrim Blum and Carl Burch. On-line learning and the metrical task system problem. *Mach. Learn.*, 39(1):35–58, 2000.
- [12] Sébastien Bubeck, Michael B. Cohen, Yin Tat Lee, James R. Lee, and Aleksander Madry. k-server via multiscale entropic regularization. In Ilias Diakonikolas, David Kempe, and Monika Henzinger, editors, *Proceedings of the 50th Annual ACM SIGACT Symposium on Theory of Computing, STOC 2018, Los Angeles, CA, USA, June 25-29, 2018*, pages 3–16. ACM, 2018.
- [13] Moses Charikar and Sudipto Guha. Improved combinatorial algorithms for the facility location and k-median problems. In *Proceedings of the 40th Annual Symposium on Foundations of Computer Science*, FOCS '99. IEEE Computer Society, 1999.
- [14] Moses Charikar, Sudipto Guha, Éva Tardos, and David B. Shmoys. A constant-factor approximation algorithm for the k-median problem (extended abstract). In *Proceedings of the Thirty-First Annual ACM Symposium on Theory of Computing*, STOC '99, page 1–10. Association for Computing Machinery, 1999.
- [15] Moses Charikar and Shi Li. A dependent lp-rounding approach for the k-median problem. In *Automata, Languages, and Programming - 39th International Colloquium, ICALP 2012*, volume 7391 of *Lecture Notes in Computer Science*, pages 194–205. Springer, 2012.
- [16] Vincent Cohen-Addad, Benjamin Guedj, Varun Kanade, and Guy Rom. Online k-means clustering. In Arindam Banerjee and Kenji Fukumizu, editors, *The 24th International Conference on Artificial Intelligence and Statistics, AISTATS 2021, April 13-15, 2021, Virtual Event*, volume 130 of *Proceedings of Machine Learning Research*, pages 1126–1134. PMLR, 2021.

- [17] Aaron Cote, Adam Meyerson, and Laura J. Poplawski. Randomized k-server on hierarchical binary trees. In Cynthia Dwork, editor, *Proceedings of the 40th Annual ACM Symposium on Theory of Computing*, Victoria, British Columbia, Canada, May 17-20, 2008, pages 227–234. ACM, 2008.
- [18] Bart de Keijzer and Dominik Wojtczak. Facility reallocation on the line. In *Proceedings of the Twenty-Seventh International Joint Conference on Artificial Intelligence, IJCAI 2018*, pages 188–194, 2018.
- [19] Sina Dehghani, Soheil Ehsani, MohammadTaghi Hajiaghayi, Vahid Liaghat, and Saeed Seddighin. Stochastic k-server: How should uber work? In Ioannis Chatzigiannakis, Piotr Indyk, Fabian Kuhn, and Anca Muscholl, editors, *44th International Colloquium on Automata, Languages, and Programming, ICALP 2017, July 10-14, 2017, Warsaw, Poland*, volume 80 of *LIPIcs*, pages 126:1–126:14. Schloss Dagstuhl - Leibniz-Zentrum für Informatik, 2017.
- [20] Sina Dehghani, MohammadTaghi Hajiaghayi, Hamid Mahini, and Saeed Seddighin. Price of competition and dueling games. *arXiv preprint arXiv:1605.04004*, 2016.
- [21] Miroslav Dudík, Nika Haghtalab, Haipeng Luo, Robert E. Schapire, Vasilis Syrgkanis, and Jennifer Wortman Vaughan. Oracle-efficient online learning and auction design. In *58th IEEE Annual Symposium on Foundations of Computer Science, FOCS 2017*, 2017.
- [22] Miroslav Dudík, Daniel J. Hsu, Satyen Kale, Nikos Karampatziakis, John Langford, Lev Reyzin, and Tong Zhang. Efficient optimal learning for contextual bandits. In *Proceedings of the Twenty-Seventh Conference on Uncertainty in Artificial Intelligence, UAI 2011*, 2011.
- [23] David Eisenstat, Claire Mathieu, and Nicolas Schabanel. Facility location in evolving metrics. In *Automata, Languages, and Programming - 41st International Colloquium ICALP 2014*, volume 8573 of *Lecture Notes in Computer Science*, pages 459–470. Springer, 2014.
- [24] Jittat Fakcharoenphol, Satish Rao, and Kunal Talwar. A tight bound on approximating arbitrary metrics by tree metrics. In *Proceedings of the Thirty-Fifth Annual ACM Symposium on Theory of Computing*, STOC ’03, page 448–455, New York, NY, USA, 2003. Association for Computing Machinery.
- [25] Jittat Fakcharoenphol, Satish Rao, and Kunal Talwar. A tight bound on approximating arbitrary metrics by tree metrics. *J. Comput. Syst. Sci.*, 69(3):485–497, 2004.
- [26] Gabriele Farina, Christian Kroer, and Tuomas Sandholm. Optimistic regret minimization for extensive-form games via dilated distance-generating functions. In *Neural Information Processing Systems*, 2019.
- [27] Hendrik Fichtenberger, Silvio Lattanzi, Ashkan Norouzi-Fard, and Ola Svensson. Consistent k-clustering for general metrics. In Daniel Marx, editor, *Proceedings of the 2021 ACM-SIAM Symposium on Discrete Algorithms, SODA 2021, Virtual Conference, January 10 - 13, 2021*, pages 2660–2678. SIAM, 2021.
- [28] Dimitris Fotakis, Loukas Kavouras, Panagiotis Kostopanagiotis, Philip Lazos, Stratis Skoulakis, and Nikos Zarifis. Reallocating multiple facilities on the line. In *Proceedings of the Twenty-Eighth International Joint Conference on Artificial Intelligence, IJCAI 2019*, pages 273–279, 2019.
- [29] Dimitris Fotakis, Thanasis Lianeas, Georgios Piliouras, and Stratis Skoulakis. Efficient online learning of optimal rankings: Dimensionality reduction via gradient descent. In *Advances in Neural Information Processing Systems 33: Annual Conference on Neural Information Processing Systems 2020, NeurIPS 2020*, 2020.
- [30] Dimitris Fotakis, Georgios Piliouras, and Stratis Skoulakis. Efficient online learning for dynamic k-clustering. In Marina Meila and Tong Zhang, editors, *Proceedings of the 38th International Conference on Machine Learning*, volume 139 of *Proceedings of Machine Learning Research*, pages 3396–3406. PMLR, 18–24 Jul 2021.

- 435 [31] Takahiro Fujita, Kohei Hatano, and Eiji Takimoto. Combinatorial online prediction via  
436 metarounding. In *24th International Conference on Algorithmic Learning Theory*, ALT 2013,  
437 2013.
- 438 [32] Dan Garber. Efficient online linear optimization with approximation algorithms. In *Proceedings*  
439 *of the 30th International Conference on Neural Information Processing Systems*, NIPS 2017,  
440 2017.
- 441 [33] Xiangyu Guo, Janardhan Kulkarni, Shi Li, and Jiayi Xian. Consistent k-median: Simpler,  
442 better and robust. In Arindam Banerjee and Kenji Fukumizu, editors, *Proceedings of The 24th*  
443 *International Conference on Artificial Intelligence and Statistics*, volume 130 of *Proceedings of*  
444 *Machine Learning Research*, pages 1135–1143. PMLR, 13–15 Apr 2021.
- 445 [34] Elad Hazan. Introduction to online convex optimization. *CoRR*, abs/1909.05207, 2019.
- 446 [35] Elad Hazan, Wei Hu, Yuanzhi Li, and Zhiyuan Li. Online improper learning with an approxi-  
447 mation oracle. In S. Bengio, H. Wallach, H. Larochelle, K. Grauman, N. Cesa-Bianchi, and  
448 R. Garnett, editors, *Advances in Neural Information Processing Systems*, volume 31. Curran  
449 Associates, Inc., 2018.
- 450 [36] Elad Hazan and Satyen Kale. Online submodular minimization. *J. Mach. Learn. Res.*, 2012.
- 451 [37] Elad Hazan, Satyen Kale, and Shai Shalev-Shwartz. Near-optimal algorithms for online matrix  
452 prediction. In *25th Annual Conference on Learning Theory*, COLT 2012, 2012.
- 453 [38] Elad Hazan and Tomer Koren. The computational power of optimization in online learning. In  
454 *Proceedings of the 48th Annual ACM Symposium on Theory of Computing*, STOC 2016, 2016.
- 455 [39] David P. Helmbold, Robert E. Schapire, and M. Long. Predicting nearly as well as the best  
456 pruning of a decision tree. In *Machine Learning*, 1997.
- 457 [40] David P. Helmbold and Manfred K. Warmuth. Learning permutations with exponential weights.  
458 In *Proceedings of the 20th Annual Conference on Learning Theory*, COLT 2007, 2007.
- 459 [41] Nicole Immorlica, Adam Tauman Kalai, Brendan Lucier, Ankur Moitra, Andrew Postlewaite,  
460 and Moshe Tennenholtz. Dueling algorithms. In *Proceedings of the Forty-Third Annual ACM*  
461 *Symposium on Theory of Computing*, STOC '11, page 215–224, New York, NY, USA, 2011.  
462 Association for Computing Machinery.
- 463 [42] Kamal Jain, Mohammad Mahdian, and Amin Saberi. A new greedy approach for facility  
464 location problems. In John H. Reif, editor, *Proceedings on 34th Annual ACM Symposium on*  
465 *Theory of Computing, May 19-21, 2002, Montréal, Québec, Canada*, pages 731–740. ACM,  
466 2002.
- 467 [43] Kamal Jain and Vijay V. Vazirani. Approximation algorithms for metric facility location  
468 and k-median problems using the primal-dual schema and lagrangian relaxation. *J. ACM*,  
469 48(2):274–296, 2001.
- 470 [44] Stefanie Jegelka and Jeff A. Bilmes. Online submodular minimization for combinatorial  
471 structures. In *Proceedings of the 28th International Conference on Machine Learning*, ICML  
472 2011, 2011.
- 473 [45] Sham Kakade, Adam Tauman Kalai, and Katrina Ligett. Playing games with approximation  
474 algorithms. In *Proceedings of the 39th Annual ACM Symposium on Theory of Computing*,  
475 STOC 2007, 2007.
- 476 [46] Adam Kalai and Santosh Vempala. Efficient algorithms for online decision problems. In *J.*  
477 *Comput. Syst. Sci.* Springer, 2003.
- 478 [47] Wouter M. Koolen, Manfred K. Warmuth, and Jyrki Kivinen. Hedging structured concepts. In  
479 *the 23rd Conference on Learning Theory, COLT 2010*, 2010.
- 480 [48] Elias Koutsoupias. The k-server problem. *Comput. Sci. Rev.*, 3(2):105–118, 2009.

- 481 [49] Elias Koutsoupias and Christos H. Papadimitriou. On the k-server conjecture. *J. ACM*, 42(5):971–  
482 983, 1995.
- 483 [50] Amit Kumar. Constant factor approximation algorithm for the knapsack median problem. In  
484 *Proceedings of the Twenty-Third Annual ACM-SIAM Symposium on Discrete Algorithms*, SODA  
485 '12, page 824–832. Society for Industrial and Applied Mathematics, 2012.
- 486 [51] Amit Kumar, Yogish Sabharwal, and Sandeep Sen. Linear-time approximation schemes for  
487 clustering problems in any dimensions. *J. ACM*, 57(2), 2010.
- 488 [52] Silvio Lattanzi and Sergei Vassilvitskii. Consistent k-clustering. In Doina Precup and Yee Whye  
489 Teh, editors, *Proceedings of the 34th International Conference on Machine Learning, ICML*  
490 *2017, Sydney, NSW, Australia, 6-11 August 2017*, volume 70 of *Proceedings of Machine*  
491 *Learning Research*, pages 1975–1984. PMLR, 2017.
- 492 [53] Shi Li and Ola Svensson. Approximating k-median via pseudo-approximation. *SIAM J. Comput.*,  
493 45(2):530–547, 2016.
- 494 [54] Jyh-Han Lin and Jeffrey Scott Vitter. Approximation algorithms for geometric median problems.  
495 *Information Processing Letters*, 44(5):245 – 249, 1992.
- 496 [55] M.E.J. Newman. The structure and function of complex networks. *SIAM review*, 45(2):167–256,  
497 2003.
- 498 [56] Romualdo Pastor-Satorras and Alessandro Vespignani. Epidemic Spreading in Scale-Free  
499 Networks. *Physical Review Letters*, 86(14):3200–3203, 2001.
- 500 [57] Holakou Rahmanian and Manfred K. Warmuth. Online dynamic programming. In *NIPS*, 2017.
- 501 [58] Juliette Stehlé, Nicolas Voirin, Alain Barrat, Ciro Cattuto, Lorenzo Isella, Jean-François Pinton,  
502 Marco Quaggiotto, Wouter Van den Broeck, Corinne Régis, Bruno Lina, and Philippe Vanhems.  
503 High-resolution measurements of face-to-face contact patterns in a primary school. *PLOS ONE*,  
504 6(8), 2011.
- 505 [59] Matthew J. Streeter and Daniel Golovin. An online algorithm for maximizing submodular  
506 functions. In *22nd Annual Conference on Neural Information Processing Systems*, NIPS 2008,  
507 2008.
- 508 [60] Daiki Suehiro, Kohei Hatano, Shuji Kijima, Eiji Takimoto, and Kiyohito Nagano. Online  
509 prediction under submodular constraints. In *Algorithmic Learning Theory*, ALT 2012, 2012.
- 510 [61] Eiji Takimoto and Manfred K. Warmuth. Predicting nearly as well as the best pruning of a  
511 planar decision graph. In *Theoretical Computer Science*, 2000.
- 512 [62] Eiji Takimoto and Manfred K. Warmuth. Path kernels and multiplicative updates. *J. Mach.*  
513 *Learn. Res.*, 2003.
- 514 [63] Chayant Tantipathananandh, Tanya Berger-Wolf, and David Kempe. A framework for com-  
515 munity identification in dynamic social networks. In *Proceedings of the 13th ACM SIGKDD*  
516 *International Conference on Knowledge Discovery and Data Mining*, KDD '07, page 717–726.  
517 Association for Computing Machinery, 2007.
- 518 [64] David P. Williamson and David B. Shmoys. *The Design of Approximation Algorithms*. Cam-  
519 bridge University Press, USA, 1st edition, 2011.
- 520 [65] Shota Yasutake, Kohei Hatano, Shuji Kijima, Eiji Takimoto, and Masayuki Takeda. Online  
521 linear optimization over permutations. In *Proceedings of the 22nd International Conference on*  
522 *Algorithms and Computation*, ISAAC 2011, 2011.
- 523 [66] Neal E. Young. K-medians, facility location, and the chernoff-wald bound. In *Proceedings of*  
524 *the Eleventh Annual ACM-SIAM Symposium on Discrete Algorithms*, SODA '00, page 86–95.  
525 Society for Industrial and Applied Mathematics, 2000.

## 526 Appendix

### 527 A Further Related Work

528 In this chapter of the appendix, we continue our discussion on the literature that relates to this work.

529 **Efficient Combinatorial Online Learning.** There exists a long line of research studying efficient  
530 online learning algorithms in various combinatorial domains (e.g., selection of paths, permutations,  
531 binary search trees etc.) [39, 61, 62, 40, 7, 59, 44, 22, 41, 65, 37, 36, 1, 2, 20, 29]. Another related  
532 line of work studies *black-box reductions* converting any  $\alpha$ -approximation (offline) algorithm to an  
533  $\mathcal{O}(\alpha)$ -regret online learning algorithm for a specific class of combinatorial optimization problems  
534 called *linear optimization problems* [46, 8, 45, 47, 60, 31, 38, 57, 21, 32, 35]. We remark that a key  
535 difference of our setting with the aforementioned works is that in the latter case the learner is not  
536 penalized for switching actions from round to round with an additional moving/switching cost. In  
537 the context of Problem 1 this means that  $\gamma = 0$  which is exactly the setting considered by [30]. As a  
538 result, apart from the fact that  $k$ -median does not belong in the class of *linear optimization problems*,  
539 the aforementioned *black-box reductions* do not apply to Problem 1 since they do not account for the  
540 moving cost.

541 **The  $k$ -server Problem.** Our work also relates with the rich line of literature on the  $k$ -server problem  
542 [49, 17, 48, 9, 19, 12]. In this setting there exists only 1 client at each round, while 1-lookahead  
543 is assumed, i.e. the request  $R_t$  is revealed prior to the action of the algorithm at step  $t$ . Moreover  
544 in  $k$ -server a facility must be placed in the exact position of the request, leading to a simpler  
545 combinatorial structure with respect to Problem 1<sup>4</sup>. However, in the  $k$ -server problem, instead of  
546 using the benchmark of *regret*, the more challenging metric of *competitive ratio* that measures the  
547 sub-optimality with respect to the *optimal dynamic solution* is used. Mostly related to ours is the work  
548 of [9] providing the first  $\text{poly}(\log n)$ -competitive algorithm for  $k$ -server by reducing the problem  
549 to the special case of HSTs. [9] first design a  $\text{poly}(\log n)$ -competitive algorithm for a fractional  
550 version of  $k$ -server at which facilities can be fractionally placed into the vertices of the HST. They  
551 then use a randomized rounding scheme to convert the fractional solution into an integral one. The  
552 basic difference of the randomized rounding scheme of [9] with the one that we introduce in this  
553 work (Algorithm Cut&Round) is that the first provides guarantees only for the moving cost of the  
554 facilities while Cut&Round provides guarantees both for the moving cost of the facilities as well as  
555 the connection cost of the clients.

556 **Consistent  $k$ -Clustering.** Another setting of clustering in the presence of unknown clients is that  
557 of *Consistent  $k$ -Clustering* [52, 33, 27]. In this setting, given an *unknown stream of clients*, a set  
558 of  $k$  facilities has to be maintained over time so that at any round  $t$ , the selected facilities form an  
559 approximately optimal solution of the sub-instance consisting of clients appeared in the time interval  
560  $\{1, t\}$ . A basic difference of Consistent  $k$ -Clustering with Problem 1 is that in the first case the  
561 moving cost is not penalized as long as the number of swaps does not exceed a certain threshold  
562 ( $\mathcal{O}(k)$ ).

---

<sup>4</sup>Given offline access to the sequence of requests, the optimal solution for the  $k$ -server can be computed in polynomial-time while the optimal static solution of Problem 1 cannot be approximated in polynomial-time with ratio less than  $(1 + 2/e)$  even under *a-priori* knowledge of the request sequence (inapproximability of  $k$ -median).

## B Proof of Theorem 2

In this chapter of the appendix we briefly discuss the details behind Theorem 2 and show how the results of [10] and [24] hold even for the specific definition of HSTs we have considered in Definition 5.

Traditionally, HSTs are not required to be balanced nor are required to have weights that are specifically powers of 2. In fact, the seminal work of [10], later improved by [24], states that there exists a randomized procedure such that for every weighted graph  $G(V, E, w)$ , it constructs (in polynomial-time) a tree  $\mathcal{T}$  such that:

1. There exists a perfect matching  $\sigma : V \mapsto L(\mathcal{T})$  that maps the vertices of  $G$  to the leaves of  $\mathcal{T}$ .
2. For any vertices  $i, j \in V$ , their corresponding distance on  $\mathcal{T}$  can only increase, i.e.  $d_G(i, j) \leq d_{\mathcal{T}}(\sigma(i), \sigma(j))$ .
3. On expectation, distances between vertices are distorted only by a logarithmic factor, i.e.  $\mathbb{E}[d_{\mathcal{T}}(\sigma(i), \sigma(j))] \leq \mathcal{O}(\log |V|) \cdot d_G(i, j)$ .
4. The weight of any edge  $e = (v, u)$  between a vertex  $v \in V(\mathcal{T})$  and its parent vertex  $u$  is precisely  $\text{diam}(G) \cdot 2^{-\text{dpt}(v)}$ .
5. The height of  $\mathcal{T}$  satisfies  $h(\mathcal{T}) \leq \lceil \log(\text{diam}(G)) \rceil$ .

The purpose of this section is to argue that one can easily transform such a tree  $\mathcal{T}$  to match our notion of HSTs (Definition 5), while maintaining the same guarantees for the distortion of the distances. Recall that we have already assumed that the minimum edge weight of  $G$  is 1, i.e.  $\min_{e \in E} w_e = 1$ . Furthermore, we can also assume without loss of generality that the diameter of  $G$  is a power of 2; if not, simple scaling arguments suffice to transform  $G$  into such a graph by only distorting distances by a constant factor. Thus, we assume that  $\text{diam}(G) = 2^d$  for some  $d \geq 0$ .

We start from the tree  $\mathcal{T}$  that the algorithm of [24] generates. Recall that by definition, the weight of an edge  $e = (i, j)$  between some vertex  $i$  and its parent node  $j$  is  $2^{d-\text{dpt}(i)}$ . In order to balance the tree, we take each leaf vertex  $u \in L(\mathcal{T})$  at depth  $\text{dpt}(u)$  and extend it downwards by adding new vertices until it reaches a new depth  $\text{dpt}'(u) = d$ . For every new edge that we add during this process, we maintain that the weight of the edge  $e = (i, j)$  from  $i$  to its parent  $j$  is  $\text{diam}(G) \cdot 2^{-\text{dpt}(i)}$ .

Let  $\mathcal{T}'$  be used to denote our modified tree. Clearly, the above construction guarantees  $h(\mathcal{T}') = d$ . Since by definition  $h(\mathcal{T}) \leq \lceil \log(\text{diam}(G)) \rceil = d$ , we know that all leaves initially lied at depth at most  $d$ , and thus by the end of the above process all leaves will lie at the same level of the tree and have depth  $d$ . Thus, we have indeed constructed a balanced tree. Furthermore, since by definition  $\text{dpt}(v) = h(\mathcal{T}) - \text{lev}(v)$ , we get that the weight of the edge  $e = (i, j)$  from  $i$  to its parent  $j$  is  $w_e = \text{diam}(G) \cdot 2^{\text{lev}(i)-d} = 2^{\text{lev}(i)}$ . So, the constructed tree indeed satisfies all the requirements of Definition 5 and is a valid HST (according to our definition).

We will now argue that  $\mathcal{T}'$  also satisfies all items of Theorem 2. First of all, the height of our new tree is precisely  $d$ , and thus it is true that  $h(\mathcal{T}') \leq \lceil \log(\text{diam}(G)) \rceil$ . Furthermore, since we only added edges to the initial tree  $\mathcal{T}$ , the distance between any two leaves can only increase. Thus, we get that for any vertices  $i, j \in V$  it holds

$$d_G(i, j) \leq d_{\mathcal{T}}(i, j) \leq d_{\mathcal{T}'}(i, j)$$

Finally, it remains to upper bound the expected distortion on  $\mathcal{T}'$ . Recall that by construction of [24], we know that

$$\mathbb{E}[d_{\mathcal{T}}(\sigma(i), \sigma(j))] \leq \mathcal{O}(\log |V|) \cdot d_G(i, j)$$

Since edge lengths decrease by a factor of 2 every time we move down the tree, we know that the total length of the path we added in order to move leaf  $i$  from depth  $\text{dpt}(i)$  to depth  $d$  is precisely  $1 + 2 + \dots + 2^{\text{dpt}(i)-1} \leq 2^{\text{dpt}(i)}$ . This implies that any distance on  $\mathcal{T}'$  can be at most twice the corresponding distance on  $\mathcal{T}$ , i.e.

$$d_{\mathcal{T}'}(\sigma(i), \sigma(j)) \leq 2 \cdot d_{\mathcal{T}}(\sigma(i), \sigma(j))$$

which completes the proof.

## C Proofs of Section 3

In this chapter of the appendix we present all the omitted proofs from Section 3 concerning the basic algorithmic primitives we use in order to establish our main result in Theorem 1.

**Roadmap.** In section C.1 we establish the connection between Problems 1 and 2 and show that our notion of fractional connection and moving cost collapses with our initial definitions in the case of integral facility placements. Then, in section C.2 we present the proof of Theorem 5 and in section C.3 we present the proof of Theorem 1.

### C.1 Establishing the relation between Problems 1 and 2

Fix any HST  $\mathcal{T}$  and let  $\mathcal{FP}(\mathcal{T})$  be the corresponding set of fractional facility placements. In this section, we will establish that in the case of integral facility placements  $y \in \mathcal{FP}(\mathcal{T}) \cap \mathbb{N}$ , the notions of fractional connection cost and fractional moving cost (formally stated in Definitions 7 and 8) collapse to the notions of actual connection and moving costs (formally stated in Definitions 1 and 2) respectively.

Let  $y \in \mathcal{FP}(\mathcal{T}) \cap \mathbb{N}$  be an integral facility placement. Then, by definition, for each leaf  $v \in L(\mathcal{T})$  we have  $y_v \in \{0, 1\}$  facilities that are placed on it, and the total amount of placed facilities is  $k$ , i.e.  $\sum_{v \in L(\mathcal{T})} y_v = k$ . Thus, we can associate with any integral facility placement  $y$  a corresponding set

$$F(y) = \{v \in L(\mathcal{T}) : y_v = 1\}$$

such that  $|F(y)| = k$ , meaning that  $F(y)$  is a valid facility placement of the leaves of the  $\mathcal{T}$ .

In Claim 1 we will establish that for any set of clients, the connection cost under  $F(y)$  is equal to the fractional connection cost under  $y$ . Then, in Claim 2 we will establish that the fractional moving cost between  $y$  and  $y'$  gives us precisely the moving cost between facility placements  $F(y)$  and  $F(y')$  on  $\mathcal{T}$ .

**Claim 1.** *For any integral facility placement  $y \in \mathcal{FP}(\mathcal{T}) \cap \mathbb{N}$  and any set of clients  $R \subseteq L(\mathcal{T})$ , it holds that*

$$f_R(y) = C_R(F(y))$$

*Proof.* Fix any  $y \in \mathcal{FP}(\mathcal{T}) \cap \mathbb{N}$  and any  $R \subseteq L(\mathcal{T})$ . By definition of the connection cost (Definition 1), we have

$$C_R(F) = \sum_{j \in R} \min_{i \in F(y)} d_{\mathcal{T}}(i, j)$$

Let's fix a particular client that lies on some leaf  $j \in L(\mathcal{T})$  of  $\mathcal{T}$ . Let  $i^* = \arg \min_{i \in F(y)} d_{\mathcal{T}}(i, j)$  be the leaf closest to  $j$  that  $F(y)$  places a facility into. Since  $\mathcal{T}$  is an HST and distances increase by a factor of 2 as we move up the tree, it is not hard to see that  $i^*$  is the leaf in  $F(y)$  whose *lowest common ancestor* (lca) with  $j$  has the smallest level. Let  $l^* = \text{lca}(j, i^*)$ . Equivalently,  $l^*$  is the minimum-level vertex in  $P(j, r)$  such that  $y_{l^*} \geq 1$ . Since  $\mathcal{T}$  is balanced, we have that the connection cost of client  $j$  under  $F(y)$  is precisely

$$C_{\{j\}}(F(y)) = 2 \cdot d_{\mathcal{T}}(j, l^*) = 2 \cdot \sum_{l=0}^{\text{lev}(l^*)-1} 2^l$$

and since by integrality we have that  $y_v = 0$  for any  $v \in P(j, l^*) \setminus \{l^*\}$  and  $y_v \geq 1$  for all  $v \in P(l^*, r)$ , we have

$$C_{\{j\}}(F) = 2 \cdot \sum_{v \in P(j, r)} 2^{\text{lev}(v)} \cdot \max(0, 1 - y_v)$$

Summing over all clients  $j \in R$  we get

$$C_R(F(y)) = \sum_{j \in R} \sum_{v \in P(j, r)} 2^{\text{lev}(v)+1} \cdot \max(0, 1 - y_v) = f_R(y)$$

which concludes the proof.  $\square$



633 **Claim 2.** For any integral facility placements  $y, y' \in \mathcal{FP}(\mathcal{T}) \cap \mathbb{N}$ , it holds that

$$\|y - y'\|_{\mathcal{T}} = \gamma \cdot M_{\mathcal{T}}(F(y), F(y'))$$

634 *Proof.* Fix any two integral facility placements  $y, y' \in \mathcal{FP}(\mathcal{T}) \cap \mathbb{N}$ . By definition of the moving  
635 cost (Definition 2), we have that

$$M_{\mathcal{T}}(F(y), F(y')) = \min_{\sigma \in \Sigma} \sum_{i \in F(y)} d_{\mathcal{T}}(i, \sigma(i))$$

636 where  $\Sigma$  is the set of all possible matchings from the facilities in  $F(y)$  to the facilities in  $F(y')$ .

637 In general graphs, the minimum transportation cost can have a very complicated structure and  
638 typically requires solving a minimum transportation problem in order to compute it. However, in the  
639 special case of HSTs, we are actually able to obtain a very simple expression for this quantity.

640 Recall that in an HST  $\mathcal{T}$ , edge weights increase by a factor of 2 every time we move up a level on  
641 the tree. Thus, it is always in our interest to move facilities between leaves whose lowest common  
642 ancestor is as low as possible. In other words, the matching  $\sigma$  that minimizes the transportation cost  
643 from  $F(y)$  to  $F(y')$  can be obtained by selecting an arbitrary leaf in  $F(y)$ , matching it to the leaf in  
644  $F(y')$  with which it shares the *lowest* lowest common ancestor and then repeating the process for the  
645 rest of the leaves.

646 Now fix any vertex  $v \in V(\mathcal{T})$ . Recall that  $y_v$  is equal to the number of facilities in  $F(y)$  that are  
647 placed in the descendant leaves of  $v$  (respectively for  $y'_v$ ). Thus, if we apply the above (optimal)  
648 transportation plan, the number of facilities that will end up traversing the edge from  $v$  to its parent  
649 vertex is going to be precisely  $|y_v - y'_v|$ . Since the weight of this edge is by definition  $2^{\text{lev}(v)}$ , we get  
650 that

$$M_{\mathcal{T}}(F(y), F(y')) = \sum_{v \in V(\mathcal{T})} 2^{\text{lev}(v)} \cdot |y_v - y'_v|$$

651 and since

$$\|y - y'\|_{\mathcal{T}} = \gamma \cdot \sum_{v \in V(\mathcal{T})} 2^{\text{lev}(v)} \cdot |y_v - y'_v|$$

652 we have proven the claim.

653 □

## 654 C.2 Proof of Theorem 5

655 We will now formally present the proof of Theorem 5, bounding the expected total cost of Algorithm 1.  
656 Fix any sequence of clients  $R_1, \dots, R_T$ . Since the random seed  $\alpha$  is selected uniformly at random  
657 (Step 3 of Algorithm 1), by Item 1 of Theorem 4 we get that

$$\mathbb{E}[C_{R_t}(F_t)] = f_{R_t}(y^t)$$

658 Moreover since the same random seed  $\alpha$  is used at all rounds  $t \geq 1$ , Item 2 of Theorem 4 implies that

$$\gamma \cdot \mathbb{E}[M_{\mathcal{T}}(F_{t+1}, F_t)] \leq 4 \cdot \|y^{t+1} - y^t\|_{\mathcal{T}}$$

659 Thus,

$$\begin{aligned} \mathbb{E} \left[ \sum_{t=1}^T C_{R_t}(F_t) + \gamma \cdot \sum_{t=2}^T M_{\mathcal{T}}(F_t, F_{t-1}) \right] &\leq 4 \cdot \left( \sum_{t=1}^T f_{R_t}(y^t) + \sum_{t=2}^T \|y^t - y^{t-1}\|_{\mathcal{T}} \right) \\ &\leq 6 \cdot \min_{y^* \in \mathcal{FP}} \sum_{t=1}^T f_{R_t}(y^*) + \beta \cdot \sqrt{T} \end{aligned}$$

660 where the last inequality follows by Theorem 3 for  $\beta = \mathcal{O}(k \cdot |L(\mathcal{T})|^{3/2} \cdot D_{\mathcal{T}} \cdot \max(\gamma, 1))$ . The  
661 proof is concluded by the fact that

$$\min_{y^* \in \mathcal{FP}} \sum_{t=1}^T f_{R_t}(y^*) \leq \min_{|F^*|=k} \sum_{t=1}^T C_{R_t}(F^*)$$

662 which is established in Claim 1 of Appendix C.1, stating that for any placement of  $k$ -facilities  
663  $F \subseteq L(\mathcal{T})$  there exists a corresponding  $y \in \mathcal{FP}(\mathcal{T})$  whose fractional connection cost is equal to  $F$ 's  
664 under any client request.

### 665 C.3 Proof of Theorem 1

666 We will now formally present the proof of Theorem 1, bounding the regret of Algorithm 2.

667 Let  $\mathcal{T}$  be the HST that we randomly embed our graph  $G(V, E, w)$  into. Since  $V = L(\mathcal{T})$ , we slightly  
 668 abuse notation and use  $u$  to refer both to some vertex of  $G$  and to the corresponding leaf of  $\mathcal{T}$ . From  
 669 Theorem 5, we know that the output of Algorithm 1 satisfies

$$\begin{aligned} \mathbb{E} \left[ \sum_{t=1}^T C_{R_t}^{\mathcal{T}}(F_t) + \gamma \cdot \sum_{t=2}^T M_{\mathcal{T}}(F_t, F_{t-1}) \right] &\leq 6 \cdot \min_{|F^*|=k} \sum_{t=1}^T C_{R_t}^{\mathcal{T}}(F^*) \\ &\quad + \mathcal{O} \left( k \cdot |L(\mathcal{T})|^{3/2} \cdot D_{\mathcal{T}} \cdot \max(1, \gamma) \right) \cdot \sqrt{T} \end{aligned}$$

670 where we use  $\mathcal{T}$  in the connection and moving cost to indicate that all distances are measured on the  
 671 HST. Here, the expectation is taken over the random choices of Algorithm 1.

672 Next, notice that both the connection cost and the moving cost are defined as sum of distances. Thus,  
 673 the results of Theorem 2 about the distance distortion from  $G$  to  $\mathcal{T}$  clearly apply for these quantities  
 674 as well, namely

$$C_{R_t}^G(F_t) \leq C_{R_t}^{\mathcal{T}}(F_t) \text{ and } \mathbb{E} [C_{R_t}^{\mathcal{T}}(F_t)] \leq \mathcal{O}(\log |V|) \cdot C_{R_t}^G(F_t)$$

675 and

$$M_G(F_t, F_{t-1}) \leq M_{\mathcal{T}}(F_t, F_{t-1}) \text{ and } \mathbb{E} [M_{\mathcal{T}}(F_t, F_{t-1})] \leq \mathcal{O}(\log |V|) \cdot M_G(F_t, F_{t-1})$$

676 Thus, taking an expectation over the randomness of  $\mathcal{T}$ , we finally get that

$$\begin{aligned} \mathbb{E} \left[ \sum_{t=1}^T C_{R_t}^G(F_t) + \gamma \cdot \sum_{t=2}^T M_G(F_t, F_{t-1}) \right] &\leq \mathcal{O}(\log |V|) \cdot \min_{|F^*|=k} \sum_{t=1}^T C_{R_t}^G(F^*) \\ &\quad + \mathcal{O} \left( k \cdot |L(\mathcal{T})|^{3/2} \cdot D_{\mathcal{T}} \cdot \max(1, \gamma) \right) \cdot \sqrt{T} \end{aligned}$$

677 Let  $n = |V|$  and  $D = \text{diam}(G)$ . From the above, we get that Algorithm 2 is indeed  $\alpha$ -regret for  
 678  $\alpha = \mathcal{O}(\log n)$ . Furthermore, we have that  $|L(\mathcal{T})| = |V| = n$ , and  $D_{\mathcal{T}} = 2 \cdot (2^{h(\mathcal{T})} - 1) \leq 4D$   
 679 since  $h(\mathcal{T}) \leq \lceil \log D \rceil$ . Thus, setting  $\beta = \mathcal{O}(k \cdot n^{3/2} \cdot D \cdot \max(1, \gamma))$ , we get that Algorithm 2 has  
 680  $\beta$ -additive regret, completing the proof of Theorem 1.

## D Analysis of FTRL (Proofs of Section 4)

In this chapter of the appendix we present all the omitted proofs from Section 4 concerning our analysis of the *Follow the Regularized Leader* (FTRL) algorithm (Algorithm 3). To avoid repetition, from now on we fix an arbitrary HST  $\mathcal{T}$  and use  $\mathcal{FP}(\mathcal{T})$  to denote the set of all fractional placements of  $k$  facilities on the leaves of  $\mathcal{T}$ . We use  $n = |L(\mathcal{T})|$  to denote the number of leaves of  $\mathcal{T}$ ,  $h = h(\mathcal{T})$  to denote its height and  $D = \text{diam}(\mathcal{T})$  to denote its diameter. Since  $\mathcal{T}$  is an HST, we know that its diameter  $D$ , i.e. the maximum distance between any two leaves, is precisely  $D = 2 \cdot (2^h - 1)$ .

To ease notation, let  $w_v = 2^{\text{lev}(v)}$ . For convenience, we remind the reader that our regularizer function  $R_{\mathcal{T}} : \mathcal{FP}(\mathcal{T}) \mapsto \mathbb{R}$  is defined as

$$R_{\mathcal{T}}(y) = \sum_{v \neq r} w_v \cdot (y_v + \delta_v) \cdot \ln \left( \frac{y_v + \delta_v}{y_{p(v)} + \delta_{p(v)}} \right)$$

where  $\delta_v = k \cdot |L(\mathcal{T}) \cap T(v)| / |L(\mathcal{T})|$  is the percentage of leaves that lie on the sub-tree rooted at vertex  $v$  multiplied by  $k$  and  $p(v)$  is the parent of node  $v$ . Also, recall that for any  $y \in \mathcal{FP}(\mathcal{T})$  we have defined the norm

$$\|y\|_{\mathcal{T}} = \gamma \cdot \sum_{v \in V(\mathcal{T})} w_v |y_v|$$

**Roadmap.** In Section D.1 we prove Lemma 1, namely the strong convexity of  $R_{\mathcal{T}}$  with respect to  $\|\cdot\|_{\mathcal{T}}$ . Then, in Section D.2 we bound the moving cost of FTRL, proving Lemma 2. Next, in Section D.3 we bound the connection cost of FTRL, proving Lemma 3. Finally, in Section D.4 we account for approximation errors in the computation of the regularized leader, proving Lemma 4.

### D.1 Strong Convexity (Proof of Lemma 1)

The objective of this section is to prove Lemma 1, specifically that for any fractional facility placements  $y, y' \in \mathcal{FP}(\mathcal{T})$  it holds that

$$R_{\mathcal{T}}(y') \geq R_{\mathcal{T}}(y) + \langle \nabla R_{\mathcal{T}}(y), y' - y \rangle + \alpha \|y - y'\|_{\mathcal{T}}^2$$

where  $\alpha = (8kD\gamma^2)^{-1}$ .

We begin by computing the gradient of  $R_{\mathcal{T}}$  on any fractional facility placement  $y \in \mathcal{FP}(\mathcal{T})$ .

**Claim 3.** *The partial derivatives of  $R_{\mathcal{T}}$  on any point  $y \in \mathcal{FP}(\mathcal{T})$  are given by*

$$\frac{\partial R_{\mathcal{T}}(y)}{\partial y_v} = \begin{cases} -\frac{w_v}{2} & \text{for } v = r \\ w_v \cdot \ln \left( \frac{y_v + \delta_v}{y_{p(v)} + \delta_{p(v)}} \right) + w_v & \text{for } v \in L(\mathcal{T}) \\ w_v \cdot \ln \left( \frac{y_v + \delta_v}{y_{p(v)} + \delta_{p(v)}} \right) + \frac{w_v}{2} & \text{for } v \notin L(\mathcal{T}) \cup \{r\} \end{cases}$$

*Proof.* Clearly,  $R_{\mathcal{T}}$  is well-defined and differentiable on  $\mathcal{FP}(\mathcal{T})$ . For any  $v \neq r$ , we compute the partial derivatives of  $R_{\mathcal{T}}(y)$  to obtain

$$\frac{\partial R_{\mathcal{T}}(y)}{\partial y_v} = w_v \cdot \ln \left( \frac{y_v + \delta_v}{y_{p(v)} + \delta_{p(v)}} \right) + w_v - \sum_{u \in \text{cld}(v)} w_u \cdot \frac{y_u + \delta_u}{y_v + \delta_v}$$

Since  $y \in \mathcal{FP}(\mathcal{T})$ , we know  $y_v = \sum_{u \in \text{cld}(v)} y_u$  and by definition,  $\delta_v = \sum_{u \in \text{cld}(v)} \delta_u$ . Finally, recall that  $w_u = w_v/2$  for any  $u \in \text{cld}(v)$ . By plugging everything in we get

$$\frac{\partial R_{\mathcal{T}}(y)}{\partial y_v} = w_v \cdot \ln \left( \frac{y_v + \delta_v}{y_{p(v)} + \delta_{p(v)}} \right) + w_v - \frac{w_v}{2} \cdot \mathbb{1}[v \notin L(\mathcal{T})]$$

for any  $v \neq r$ . For the root vertex, using similar arguments we get

$$\frac{\partial R_{\mathcal{T}}(y)}{\partial y_r} = -\frac{w_r}{2}$$

708

□

709 Now that we have calculated the gradient of  $R_{\mathcal{T}}$ , we can substitute it into the definition of strong  
 710 convexity. Specifically, by Claim 3, Lemma 1 states that

$$\sum_{v \neq r} w_v \cdot (y'_v + \delta_v) \cdot \ln \left( \frac{\frac{y'_v + \delta_v}{y'_{p(v)} + \delta_{p(v)}}}{\frac{y_v + \delta_v}{y_{p(v)} + \delta_{p(v)}}} \right) \geq \frac{1}{8kD\gamma^2} \cdot \|y' - y\|_{\mathcal{T}}^2 \quad (1)$$

711 To ease the presentation, we define quantities

$$f(y', y) = \sum_{v \neq r} w_v \cdot (y'_v + \delta_v) \cdot \ln \left( \frac{\frac{y'_v + \delta_v}{y'_{p(v)} + \delta_{p(v)}}}{\frac{y_v + \delta_v}{y_{p(v)} + \delta_{p(v)}}} \right)$$

712 and

$$h(y', y) = \sum_{v \neq r} w_v \cdot (y_{p(v)} + \delta_{p(v)}) \cdot \left| \frac{y'_v + \delta_v}{y'_{p(v)} + \delta_{p(v)}} - \frac{y_v + \delta_v}{y_{p(v)} + \delta_{p(v)}} \right|$$

713 We will prove that  $f(y', y) \geq (1/2kD) \cdot h^2(y', y)$  and that  $h(y', y) \geq (1/2\gamma) \cdot \|y' - y\|_{\mathcal{T}}$  in Claims 4  
 714 and 5 respectively. Combining these claims, equation (1) clearly holds, completing the proof of  
 715 Lemma 1.

716 **Claim 4.** For any  $y, y' \in \mathcal{FP}(\mathcal{T})$ , it holds that  $f(y', y) \geq \frac{1}{2kD} \cdot (h(y', y))^2$ .

717 *Proof.* We begin by establishing some notation. For any  $v \neq r$ , let

$$\mu'_v = w_v \cdot (y'_{p(v)} + \delta_{p(v)}) \cdot \frac{y'_v + \delta_v}{y'_{p(v)} + \delta_{p(v)}}$$

718 and

$$\mu_v = w_v \cdot (y_{p(v)} + \delta_{p(v)}) \cdot \frac{y_v + \delta_v}{y_{p(v)} + \delta_{p(v)}}.$$

719 Then, we have that

$$\begin{aligned} f(y', y) &= \sum_{v \neq r} \mu'_v \cdot \ln \left( \frac{\mu'_v}{\mu_v} \right) \\ &= \sum_{v \in I} \mu'_v \cdot \ln \left( \frac{\mu'_v}{\mu_v} \right) + \sum_{v \in I'} \mu'_v \cdot \ln \left( \frac{\mu'_v}{\mu_v} \right) \end{aligned}$$

720 where  $I = \{v \neq r : \mu'_v \geq \mu_v\}$  and  $I' = \{v \neq r : \mu'_v < \mu_v\}$ . By applying the log-sum inequality in  
 721 both of these terms, we obtain

$$f(y', y) \geq \left( \sum_{v \in I} \mu'_v \right) \cdot \ln \left( \frac{\sum_{v \in I} \mu'_v}{\sum_{v \in I} \mu_v} \right) + \left( \sum_{v \in I'} \mu'_v \right) \cdot \ln \left( \frac{\sum_{v \in I'} \mu'_v}{\sum_{v \in I'} \mu_v} \right)$$

722 Next, observe that

$$\sum_{v \neq r} \mu'_v = \sum_{v \neq r} w_v \cdot (y'_v + \delta_v) = 2k \cdot (2^h - 1) = k \cdot D$$

723 and also

$$\begin{aligned} \sum_{v \neq r} \mu_v &= \sum_{v \neq r} w_v \cdot (y_{p(v)} + \delta_{p(v)}) \cdot \frac{y_v + \delta_v}{y_{p(v)} + \delta_{p(v)}} \\ &= \sum_{v \notin L(\mathcal{T})} \left( \frac{w_v}{2} \cdot (y'_v + \delta_v) \cdot \sum_{u \in \text{cld}(v)} \frac{y_u + \delta_u}{y_v + \delta_v} \right) \\ &= \sum_{v \notin L(\mathcal{T})} \frac{w_v}{2} \cdot (y'_v + \delta_v) \\ &= \frac{1}{2} \cdot 2k \cdot (2^{h+1} - 2) \\ &= k \cdot D. \end{aligned}$$

724 Let  $B' = \sum_{v \in I} \mu'_v$  and  $B = \sum_{v \in I} \mu_v$ . Then, we have shown that

$$f(y', y) \geq B' \cdot \ln \left( \frac{B'}{B} \right) + (kD - B') \cdot \ln \left( \frac{kD - B'}{kD - B} \right) \quad (2)$$

725 Our next step is to apply Pinsker's inequality to the above expression. Pinsker's inequality states that  
726 for any  $p, q \in (0, 1)$ , it holds that

$$p \cdot \ln \left( \frac{p}{q} \right) + (1 - p) \cdot \ln \left( \frac{1 - p}{1 - q} \right) \geq 2 \cdot (p - q)^2$$

727 Since  $B \leq kD$  and  $B' \leq kD$ , we can scale everything in inequality 2 and apply Pinsker's inequality  
728 to obtain

$$f(y', y) \geq \frac{2}{kD} \cdot (B - B')^2 \quad (3)$$

729 To complete the proof, we substitute

$$\begin{aligned} B' - B &= \sum_{v \in I} (\mu'_v - \mu_v) \\ &= \sum_{v \in I} w_v \cdot (y'_{p(v)} + \delta_{p(v)}) \cdot \left( \frac{y'_v + \delta_v}{y'_{p(v)} + \delta_{p(v)}} - \frac{y_v + \delta_v}{y_{p(v)} + \delta_{p(v)}} \right) \\ &= \sum_{v \notin L(\mathcal{T})} \frac{w_v}{2} \cdot (y'_v + \delta_v) \cdot \sum_{u \in \text{cld}(v) \cap I} \left( \frac{y'_u + \delta_u}{y'_v + \delta_v} - \frac{y_u + \delta_u}{y_v + \delta_v} \right) \\ &= \frac{1}{2} \cdot \sum_{v \notin L(\mathcal{T})} \frac{w_v}{2} \cdot (y'_v + \delta_v) \cdot \sum_{u \in \text{cld}(u)} \left| \frac{y'_u + \delta_u}{y'_v + \delta_v} - \frac{y_u + \delta_u}{y_v + \delta_v} \right| \end{aligned}$$

730 where the last equality follows from the fact that the ratio in the inner sum always sum to 1, and  
731 thus by only summing over the ones with positive difference we get half of the total sum of absolute  
732 differences. By swapping the summation order once again, we get

$$\begin{aligned} B' - B &= \frac{1}{2} \cdot \sum_{v \neq r} w_v \cdot (y'_{p(v)} + \delta_{p(v)}) \cdot \left| \frac{y'_v + \delta_v}{y'_{p(v)} + \delta_{p(v)}} - \frac{y_v + \delta_v}{y_{p(v)} + \delta_{p(v)}} \right| \\ &= \frac{1}{2} \cdot h(y', y) \end{aligned}$$

733 and from inequality (3) we finally get

$$f(y', y) \geq \frac{1}{2kD} \cdot (h(y', y))^2$$

734 as desired. □

735 **Claim 5.** For any  $y, y' \in \mathcal{FP}(\mathcal{T})$ , it holds that  $\|y' - y\|_{\mathcal{T}} \leq 2\gamma \cdot h(y', y)$ .

736 *Proof.* To prove the claim, we first need to establish some extra notation. For any  $y \in \mathcal{FP}(\mathcal{T})$  and  
737  $v \neq r$ , let

$$\lambda_v(y) := \frac{y_v + \delta_v}{y_{p(v)} + \delta_{p(v)}}$$

738 Furthermore, for any vertex  $v$  and any integer  $i \in [0, h - \text{lev}(v)]$ , we use  $p(v, i)$  to denote the  $i$ -th  
739 ancestor of  $v$  on  $\mathcal{T}$ , for example  $p(v, 0) = v$ ,  $p(v, 1) = p(v)$  and  $p(v, h - \text{lev}(v)) = r$ .

740 Recall that by definition,  $y_r = \delta_r = k$ . Thus, if we telescope these terms and let  $m_v = h - \text{lev}(v) - 1$ ,  
741 we clearly have that

$$y_v + \delta_v = 2k \cdot \prod_{i=0}^{m_v} \lambda_{p(v, i)}(y)$$

742 which implies

$$\begin{aligned}
y'_v - y_v &= 2k \cdot \prod_{i=0}^{m_v} \lambda_{p(v,i)}(y') - 2k \cdot \prod_{i=0}^{m_v} \lambda_{p(v,i)}(y) \\
&= 2k \cdot \sum_{i=0}^{m_v} \lambda_{p(v,0)}(y') \cdot \dots \cdot (\lambda_{p(v,i)}(y') - \lambda_{p(v,i)}(y)) \cdot \dots \cdot \lambda_{p(v,m_v)}(y) \\
&= 2k \cdot \sum_{i=0}^{m_v} \frac{y'_v + \delta_v}{y'_{p(v,i)} + \delta_{p(v,i)}} \cdot (\lambda_{p(v,i)}(y') - \lambda_{p(v,i)}(y)) \cdot \frac{y_{p(v,i+1)} + \delta_{p(v,i+1)}}{2k} \\
&= (y'_v + \delta_v) \cdot \sum_{i=0}^{m_v} \frac{y_{p(v,i+1)} + \delta_{p(v,i+1)}}{y'_{p(v,i)} + \delta_{p(v,i)}} \cdot (\lambda_{p(v,i)}(y') - \lambda_{p(v,i)}(y))
\end{aligned}$$

743 and from the triangular inequality

$$|y'_v - y_v| \leq (y'_v + \delta_v) \cdot \sum_{i=0}^{m_v} \frac{y_{p(v,i+1)} + \delta_{p(v,i+1)}}{y'_{p(v,i)} + \delta_{p(v,i)}} \cdot |\lambda_{p(v,i)}(y') - \lambda_{p(v,i)}(y)| \quad (4)$$

744 Plugging inequality (4) into the definition of norm  $\|\cdot\|_{\mathcal{T}}$ , we get

$$\|y' - y\|_{\mathcal{T}} \leq \gamma \cdot \sum_{v \neq r} w_v \cdot (y'_v + \delta_v) \cdot \left( \sum_{i=0}^{m_v} \frac{y_{p(v,i+1)} + \delta_{p(v,i+1)}}{y'_{p(v,i)} + \delta_{p(v,i)}} \cdot |\lambda_{p(v,i)}(y') - \lambda_{p(v,i)}(y)| \right)$$

745 and by carefully exchanging the summation order, we obtain

$$\|y' - y\|_{\mathcal{T}} \leq \gamma \cdot \sum_{v \neq r} \frac{y_{p(v)} + \delta_{p(v)}}{y'_v + \delta_v} \cdot |\lambda_v(y') - \lambda_v(y)| \cdot \left( \sum_{u \in T(v)} w_u (y'_u + \delta_u) \right)$$

746 Finally, observe that  $\sum_{u \in T(v)} w_u y'_u \leq 2w_v y'_v$ . To see this, fix the sub-tree  $T(v)$  rooted at vertex  
747  $v$  and recall that since  $y' \in \mathcal{FP}(\mathcal{T})$ , the total amount of facilities at each level is  $y'_v$ . Furthermore,  
748 the weights  $w_v$  decrease by a factor of 2 at every level. Using the same arguments, we obtain  
749  $\sum_{u \in T(v)} w_u \delta_u \leq 2w_v \delta_v$ . Combining everything, we finally get

$$\|y' - y\|_{\mathcal{T}} \leq 2\gamma \cdot \sum_{v \neq r} w_v \cdot (y_{p(v)} + \delta_{p(v)}) \cdot |\lambda_v(y') - \lambda_v(y)|$$

750 or equivalently,  $\|y' - y\|_{\mathcal{T}} \leq 2\gamma \cdot h(y', y)$ . □

## 751 D.2 Bounding the Moving Cost (Proof of Lemma 2)

752 In this section we will upper bound the moving cost of FTRL by its connection cost. Fix any  
753 sequence of client requests  $R_1, R_2, \dots, R_T \subseteq L(\mathcal{T})$ . Recall that at each step  $t$ , FTRL selects a  
754 fractional facility placement  $y^t$  given by

$$y^t = \arg \min_{y \in \mathcal{FP}(\mathcal{T})} \Phi_t(y)$$

755 where  $\Phi_t(y) = \sum_{s=1}^{t-1} f_{R_s}(y) + \frac{1}{\eta} \cdot R_{\mathcal{T}}(y)$  is the objective that FTRL minimizes over at step  $t$  for  
756  $\eta = (\gamma \cdot \sqrt{nT})^{-1}$ . In this section, we prove Lemma 2, by arguing that

$$\sum_{t=2}^T \|y^t - y^{t-1}\|_{\mathcal{T}} \leq \frac{1}{2} \cdot \sum_{t=1}^T f_{R_t}(y^t) + \frac{\eta}{2\alpha} \cdot T$$

757 since the proof follows easily by the definitions of  $\eta$  and  $\alpha$ .

758 From Lemma 1 we already know that  $R_{\mathcal{T}}$  is  $\alpha$ -strongly convex with respect to  $\|\cdot\|_{\mathcal{T}}$  for  $\alpha =$   
759  $(8kD\gamma^2)^{-1}$ . Furthermore, by definition the fractional connection cost

$$f_R(y) = \sum_{j \in R} \sum_{v \in P(j,r)} 2^{lev(v)+1} \cdot \max(0, 1 - y_v)$$

is clearly convex for any client request  $R \subseteq L(\mathcal{T})$ . Thus, it is straight-forward to argue that at any step  $t$ , the FTRL objective  $\Phi_t$  is  $\frac{\alpha}{\eta}$ -strongly convex with respect to  $\|\cdot\|_{\mathcal{T}}$ . Unfortunately,  $f_R(y)$  is not differentiable on  $\mathcal{FP}(\mathcal{T})$ , but its sub-gradients are well-defined on any  $y \in \mathcal{FP}(\mathcal{T})$ . Thus, the strong convexity of  $\Phi_t$  provides us with the following guarantee:

**Claim 6.** Fix any pair of fractional facility placements  $y, y' \in \mathcal{FP}(\mathcal{T})$  and any time step  $t \in [T]$ . Let  $g_t \in \partial\Phi_t(y)$  be any sub-gradient of  $\Phi_t$  at  $y$ . Then, it holds that

$$\Phi_t(y') \geq \Phi_t(y) + \langle g_t, y' - y \rangle + \frac{\alpha}{\eta} \cdot \|y - y'\|_{\mathcal{T}}^2$$

Furthermore, since by definition  $y^t$  is the (unique) minimizer of  $\Phi_t$ , the first order optimality conditions on  $\Phi_t$  imply that there exists some  $g_t^* \in \partial\Phi_t(y^t)$  such that  $\langle g_t^*, y - y^t \rangle \geq 0$  for any  $y \in \mathcal{FP}(\mathcal{T})$ . Claim 6 for  $y = y^t, y' = y^{t-1}$  and  $g_t = g_t^*$  gives us

$$\Phi_t(y^{t-1}) \geq \Phi_t(y^t) + \frac{\alpha}{\eta} \cdot \|y^t - y^{t-1}\|_{\mathcal{T}}^2$$

Thus, we have

$$\begin{aligned} \|y^t - y^{t-1}\|_{\mathcal{T}}^2 &\leq \frac{\eta}{\alpha} \cdot (\Phi_t(y^{t-1}) - \Phi_t(y^t)) \\ &= \frac{\eta}{\alpha} \cdot (\Phi_{t-1}(y^{t-1}) + f_{R_{t-1}}(y^{t-1}) - \Phi_{t-1}(y^t) - f_{R_{t-1}}(y^t)) \\ &\leq \frac{\eta}{\alpha} \cdot (f_{R_{t-1}}(y^{t-1}) - f_{R_{t-1}}(y^t)) \end{aligned}$$

where for the equality we used the fact that  $\Phi_t(y) = \Phi_{t-1}(y) + f_{R_{t-1}}(y)$  and for the second inequality we used the fact that  $y^{t-1}$  is by definition the minimizer of  $\Phi_{t-1}$ . Finally, since  $f_R(y) \geq 0$  for any client request  $R \subseteq L(\mathcal{T})$ , we have

$$\begin{aligned} \|y^t - y^{t-1}\|_{\mathcal{T}} &\leq \sqrt{\frac{\eta}{\alpha} \cdot f_{R_{t-1}}(y^{t-1})} \\ &\leq \frac{\eta}{2\alpha} + \frac{1}{2} \cdot f_{R_{t-1}}(y^{t-1}) \end{aligned}$$

where the last inequality follows from the *Arithmetic Mean - Geometric Mean* inequality. Summing over all  $t$  completes the proof of Lemma 2.

### D.3 Bounding the Connection Cost (Proof of Lemma 3)

In this section we will upper bound the connection cost of FTRL by the connection cost of the optimal fractional facility placement in hindsight. This is a standard analysis found in many textbooks, and we present it just for the sake of completeness.

Fix any sequence of client requests  $R_1, R_2, \dots, R_T \subseteq L(\mathcal{T})$ . Recall that at each step  $t$ , FTRL selects a fractional facility placement  $y^t$  given by

$$y^t = \arg \min_{y \in \mathcal{FP}(\mathcal{T})} \Phi_t(y)$$

where  $\Phi_t(y) = \sum_{s=1}^{t-1} f_{R_s}(y) + \frac{1}{\eta} \cdot R_{\mathcal{T}}(y)$  is the objective that FTRL minimizes over at step  $t$  for  $\eta = (\gamma \cdot \sqrt{nT})^{-1}$ . Let  $y^*$  be the optimal facility placement in hindsight, i.e.

$$y^* = \arg \min_{y \in \mathcal{FP}(\mathcal{T})} \sum_{t=1}^T f_{R_t}(y)$$

In this section we prove Lemma 3, by arguing that

$$\sum_{t=1}^T f_{R_t}(y^t) \leq \sum_{t=1}^T f_{R_t}(y^*) + \frac{knD}{\eta} + 32kn^2D\eta \cdot T$$

and then the proof follows easily by definition of  $\eta$ .

In the standard analysis of FTRL, the following quantities are of special interest as they appear in the final regret guarantees of the algorithm:

- Let  $\text{diam}(R_{\mathcal{T}}) := \max_{y, y' \in \mathcal{FP}(\mathcal{T})} |R_{\mathcal{T}}(y) - R_{\mathcal{T}}(y')|$  be the diameter of the regularizer.
- Let  $G_f$  be an upper bound on the dual norm of the sub-gradient of the fractional connection cost for any client request, i.e. for any  $R \subseteq L(\mathcal{T})$  and any  $y \in \mathcal{FP}(\mathcal{T})$ , there exists some sub-gradient  $g \in \partial f_R(y)$  such that  $\|g\|_{\mathcal{T}}^* \leq G_f$ . Here,  $\|\cdot\|_{\mathcal{T}}^*$  denotes the dual norm of  $\|\cdot\|_{\mathcal{T}}$ .

We begin by presenting the standard analysis of FTRL and deriving an expression for the regret guarantee that depends on the above quantities. Recall that at any step  $t$ , the FTRL objective  $\Phi_t$  doesn't include  $f_{R_t}$  since the client request  $R_t$  is not revealed to the algorithm at the time of decision. We begin by bounding the connection cost of a theoretical algorithm that has access to this information and thus at time  $t$  can pick facility placement  $y^{t+1}$ .

**Claim 7.** *The output of FTRL satisfies*

$$\sum_{t=1}^T f_{R_t}(y^{t+1}) \leq \sum_{t=1}^T f_{R_t}(y^*) + \frac{\text{diam}(R_{\mathcal{T}})}{\eta}$$

*Proof.* We have

$$\begin{aligned} \Phi_t(y^t) &= \Phi_{t-1}(y^t) + f_{R_{t-1}}(y^t) \\ &\geq \Phi_{t-1}(y^{t-1}) + f_{R_{t-1}}(y^t) \end{aligned}$$

where the equality holds by definition of  $\Phi_t$  and the inequality holds from the optimality of  $y^{t-1}$  on  $\Phi_{t-1}$ . Similarly, we obtain

$$\Phi_{t-1}(y^{t-1}) \geq \Phi_{t-2}(y^{t-2}) + f_{R_{t-2}}(y^{t-1})$$

If we keep applying this rule, we finally get that

$$\Phi_t(y^t) \geq \sum_{s=1}^{t-1} f_{R_s}(y^{s+1}) + \Phi_1(y^1)$$

Furthermore, we have  $\Phi_1(y^1) = R_{\mathcal{T}}(y_1)/\eta$  and  $\Phi_t(y^*) \geq \Phi_t(y^t)$  for all  $t$ . Thus, we get

$$\Phi_{T+1}(y^*) \geq \sum_{t=1}^T f_{R_t}(y^{t+1}) + \frac{1}{\eta} \cdot R_{\mathcal{T}}(y^1)$$

or equivalently (by substituting  $\Phi_{T+1}$ 's definition) we have

$$\sum_{t=1}^T f_{R_t}(y^{t+1}) \leq \sum_{t=1}^T f_{R_t}(y^*) + \frac{R_{\mathcal{T}}(y^*) - R_{\mathcal{T}}(y^1)}{\eta}$$

The claim follows from the definition of  $\text{diam}(R_{\mathcal{T}})$ .  $\square$

Next, we proceed by bounding the increase in the connection cost that we suffer by choosing  $y^t$  instead of  $y^{t+1}$  at time  $t$ .

**Claim 8.** *For any  $t \geq 0$ , it holds that  $f_{R_t}(y^t) \leq f_{R_t}(y^{t+1}) + \eta G_f^2 / \alpha$ .*

*Proof.* For any client request  $R \subseteq L(\mathcal{T})$ , the fractional connection cost function  $f_R(y)$  is clearly convex and its sub-gradients are well-defined on  $\mathcal{FP}(\mathcal{T})$ . By definition of  $G_f$ , we know that there exists some sub-gradient  $g \in \partial f_{R_t}(y^t)$  such that  $\|g\|_{\mathcal{T}}^* \leq G_f$ . Using this sub-gradient, we get

$$\begin{aligned} f_{R_t}(y^t) &\leq f_{R_t}(y^{t+1}) + \langle g, y^t - y^{t+1} \rangle \\ &\leq f_{R_t}(y^{t+1}) + \|g\|_{\mathcal{T}}^* \cdot \|y^t - y^{t+1}\|_{\mathcal{T}} \\ &\leq f_{R_t}(y^{t+1}) + G_f \cdot \|y^t - y^{t+1}\|_{\mathcal{T}} \end{aligned}$$



811 where the first inequality is derived from the convexity of the fractional connection cost, the second  
812 inequality is an application of Holder's inequality and the third inequality is from  $G_f$ 's definition.

813 As we have already argued in section D.2, we know that for any step  $t$ , the FTRL objective  $\Phi_t$  is  
814  $\alpha/\eta$ -strongly convex with respect to  $\|\cdot\|_{\mathcal{T}}$ . Using the definition of strong convexity, this implies that

$$\Phi_{t+1}(y^t) \geq \Phi_{t+1}(y^{t+1}) + \langle g, y^t - y^{t+1} \rangle + \frac{\alpha}{\eta} \cdot \|y^t - y^{t+1}\|_{\mathcal{T}}^2$$

815 for any sub-gradient  $g \in \partial\Phi_{t+1}(y^{t+1})$ . Furthermore, since  $y^{t+1}$  is the minimizer of  $\Phi_{t+1}$ , we  
816 know from the first order optimality conditions that we can select  $g \in \partial\Phi_{t+1}(y^{t+1})$  such that  
817  $\langle g, y - y^{t+1} \rangle \geq 0$  for any  $y \in \mathcal{FP}(\mathcal{T})$ . Using such a sub-gradient, we get

$$\begin{aligned} \|y^t - y^{t+1}\|_{\mathcal{T}}^2 &\leq \frac{\eta}{\alpha} \cdot (\Phi_{t+1}(y^t) - \Phi_{t+1}(y^{t+1})) \\ &= \frac{\eta}{\alpha} \cdot (\Phi_t(y^t) + f_{R_t}(y^t) - \Phi_t(y^{t+1}) - f_{R_t}(y^{t+1})) \\ &\leq \frac{\eta}{\alpha} \cdot (f_{R_t}(y^t) - f_{R_t}(y^{t+1})) \end{aligned}$$

818 where we just expanded  $\Phi_{t+1}$ 's definition and used the fact that  $y^t$  is the minimizer of  $\Phi_t$ .

819 Combining everything, we finally obtain

$$f_{R_t}(y^t) - f_{R_t}(y^{t+1}) \leq G_f \cdot \sqrt{\frac{\eta}{\alpha} \cdot (f_{R_t}(y^t) - f_{R_t}(y^{t+1}))}$$

820 and the claim follows. □

821 We complete the analysis of FTRL by combining Claims 7 and 8 in order to obtain the following  
822 regret guarantee:

823 **Claim 9.** *The output of FTRL satisfies*

$$\sum_{t=1}^T f_{R_t}(y^t) \leq \sum_{t=1}^T f_{R_t}(y^*) + \frac{\text{diam}(R_{\mathcal{T}})}{\eta} + \frac{\eta G_f^2}{\alpha} \cdot T$$

824 It remains to substitute the specific values of the parameters that appear in the regret guarantee.  
825 We have already proven in section D.1 that  $R_{\mathcal{T}}$  is  $\alpha$ -strongly convex with respect to  $\|\cdot\|_{\mathcal{T}}$  for  
826  $\alpha = (8kD\gamma^2)^{-1}$ . Next, we provide an upper bound for the diameter of the regularizer.

827 **Claim 10.** *It holds that  $\text{diam}(R_{\mathcal{T}}) \leq knD$ .*

*Proof.* Fix any  $y \in \mathcal{FP}(\mathcal{T})$ . By definition, we know that  $y_v \leq y_{p(v)}$  and  $\delta_v \leq \delta_{p(v)}$  for any  $v \neq r$ . Thus, the expressions inside the logarithms of the regularizer are always at most 1, which implies that  $R_{\mathcal{T}}(y) \leq 0$ . Furthermore, for any  $\alpha, \beta > 0$  it holds that  $\alpha - \beta \leq \alpha \cdot \ln(\alpha/\beta)$ . Using this inequality, we get that

$$R_{\mathcal{T}}(y) \geq \sum_{v \neq r} w_v \cdot (y_v + \delta_v - y_{p(v)} - \delta_{p(v)})$$

828 Fix any level  $l \in [0, h-1]$  and let  $V_l = \{v \in V(\mathcal{T}) : \text{lev}(v) = l\}$  denote the set of vertices of the  
829 HST at level  $l$ . Since  $y \in \mathcal{FP}(\mathcal{T})$ , we know that  $\sum_{v \in V_l} y_v = k$ , and by definition of  $\delta$ 's we know  
830 that  $\sum_{v \in V_l} \delta_v = k$  as well. Furthermore, we know that  $\sum_{v \in V_l} y_{p(v)} \leq n \cdot \sum_{v \in V_{l+1}} y_v = n \cdot k$  since  
831 any vertex  $v$  can have at most  $n$  (i.e. the total number of leaves) children. Using the same argument,

832 we have  $\sum_{v \in V_l} \delta_{p(v)} \leq n \cdot \sum_{v \in V_{l+1}} y_v = n \cdot k$ . Thus, combining everything we obtain

$$\begin{aligned}
R_{\mathcal{T}}(y) &\geq \sum_{v \neq r} w_v \cdot (y_v + \delta_v - y_{p(v)} - \delta_{p(v)}) \\
&= \sum_{l=0}^{h-1} \sum_{v \in V_l} 2^l \cdot (y_v + \delta_v - y_{p(v)} - \delta_{p(v)}) \\
&\geq \sum_{l=0}^{h-1} 2^l \cdot (2k - 2kn) \\
&= 2k(1 - n)(2^h - 1) \\
&= k(1 - n)D.
\end{aligned}$$

833 which proves our claim.  $\square$

834 Finally, we only need to find an upper bound for  $G_f$ . We begin by computing a set of sub-gradients  
835 for the fractional connection cost function.

836 **Claim 11.** Fix any client request  $R \subseteq L(\mathcal{T})$  and any  $y \in \mathcal{FP}(\mathcal{T})$ . Define the vector  $g^{R,y} \in \mathbb{R}^{|V(\mathcal{T})|}$   
837 such that

$$g_v^{R,y} = \begin{cases} 0 & \text{if } y_v \geq 1 \\ -2^{lev(v)+1} \cdot |T(v) \cap R| & \text{if } y_v < 1 \end{cases}$$

838 Then,  $g^{R,y} \in \partial f_R(y)$ , i.e.  $g^{R,y}$  is a sub-gradient of  $f_R$  on point  $y$ .

839 *Proof.* Fix any client request  $R \subseteq L(\mathcal{T})$ . By definition of the fractional connection cost on facility  
840 placement  $y \in \mathcal{FP}(\mathcal{T})$ , we have

$$f_R(y) = \sum_{j \in R} \sum_{v \in P(j,r)} 2^{lev(v)+1} \cdot \max(0, 1 - y_v)$$

841 where  $P(j, r)$  denotes the unique path from leaf  $j \in L(\mathcal{T})$  to the root  $r$ . This is clearly a convex  
842 function on  $\mathcal{FP}(\mathcal{T})$  and thus the sub-gradients of  $f_R$  are well-defined. Fix any  $v \in V(\mathcal{T})$ . We  
843 distinguish between two cases.

844 • If  $y_v < 1$ , then the partial derivative of  $f_R(y)$  is well-defined and given by

$$\frac{\partial f_R(y)}{\partial y_v} = -2^{lev(v)+1} \cdot |T(v) \cap R|$$

845 where  $T(v)$  is the set of vertices on the sub-tree rooted at vertex  $v$ .

846 • If  $y_v \geq 1$ , then clearly it doesn't contribute to  $f_R(y)$ . Using standard calculus, it is not hard  
847 to argue that in this case there exists a sub-gradient of  $f_R(y)$  whose coordinate corresponding  
848 to  $v$  is 0. Thus, we have argued that that  $g^{R,y}$  is a valid sub-gradient of  $f_R$  on point  $y$ .

849  $\square$

850 Finally, we provide an upper bound on the dual-norm of the sub-gradients that we computed on  
851 Claim 11.

852 **Claim 12.** For any  $y \in \mathcal{FP}(\mathcal{T})$  and any  $R \subseteq L(\mathcal{T})$ , it holds that  $\|g^{R,y}\|_{\mathcal{T}}^* \leq \frac{2n}{\gamma}$ .

853 *Proof.* Recall that we have defined the moving cost norm as

$$\|y\|_{\mathcal{T}} = \gamma \cdot \sum_{v \in V(\mathcal{T})} w_v \cdot y_v$$

854 which is basically a weighted  $l_1$ -norm with weights  $\gamma \cdot w_v$ . It is well-known that the dual of the  
 855  $l_1$ -norm is the  $l_\infty$  norm. Similarly, the dual of the weighted  $l_1$ -norm is a weighted  $l_\infty$  norm with  
 856 inverse weights, i.e.  $\|\cdot\|^* = l_\infty((\gamma w)^{-1})$ . Thus, we have

$$\|x\|_{\mathcal{T}}^* = \max_v \frac{|x_v|}{\gamma \cdot w_v}$$

857 Using the calculation of the sub-gradients from Claim 11 and that  $R \subseteq L(\mathcal{T})$  and thus  $|R| \leq n$ , we  
 858 immediately get the claim.  $\square$

859 Claim 10 provides us with an expression for  $\text{diam}(R_{\mathcal{T}})$  and Claim 12 provides us with an expression  
 860 for  $G_f$ . Plugging everything in into Claim 9, we complete the proof of Lemma 3.

#### 861 **D.4 Incorporating approximation errors (Proof of Lemma 4)**

862 Fix any sequence of client requests  $R_1, R_2, \dots, R_T \subseteq L(\mathcal{T})$ . Recall that at each step  $t$ , FTRL  
 863 selects a fractional facility placement  $y^t$  given by

$$y^t = \arg \min_{y \in \mathcal{FP}(\mathcal{T})} \Phi_t(y)$$

864 where  $\Phi_t(y) = \sum_{s=1}^{t-1} f_{R_s}(y) + \frac{1}{\eta} \cdot R_{\mathcal{T}}(y)$  is the objective that FTRL minimizes over at step  $t$  for  
 865  $\eta = (\gamma \cdot \sqrt{nT})^{-1}$ .

866 Now, assume that instead of minimizing  $\Phi_t(y)$  over  $\mathcal{FP}(\mathcal{T})$  to compute  $y^t$ , we are only able to  
 867 compute a fractional facility placement  $z^t \in \mathcal{FP}(\mathcal{T})$  such that  $\Phi_t(z^t) \leq \Phi_t(y^t) + \epsilon$  for some  $\epsilon > 0$ .

868 **Claim 13.** *For any step  $t$ , it holds that*

$$\|z^t - y^t\|_{\mathcal{T}} \leq \sqrt{\epsilon \cdot \frac{\eta}{\alpha}}$$

869 *Proof.* As we have already argued in section D.2, we know that for any step  $t$ , the FTRL objective  
 870  $\Phi_t$  is  $\alpha/\eta$ -strongly convex with respect to  $\|\cdot\|_{\mathcal{T}}$ . Combining this with the first order optimality  
 871 condition for  $\Phi_t$  on  $y_t$ , we get

$$\Phi_t(z^t) \geq \Phi_t(y^t) + \frac{\alpha}{\eta} \cdot \|z^t - y^t\|_{\mathcal{T}}^2$$

872 which implies that

$$\|z^t - y^t\|_{\mathcal{T}} \leq \sqrt{\epsilon \cdot \frac{\eta}{\alpha}}$$

873  $\square$

874 Using Claim 13, we can easily bound both the connection and the moving cost of the approximated  
 875 FTRL solutions.

876 • For the connection cost, recall that the fractional connection cost function  $f_{R_t}$  at step  $t$  is  
 877 convex, which implies that

$$f_{R_t}(z^t) \leq f_{R_t}(y^t) + \langle g, z^t - y^t \rangle$$

878 for some  $g \in \partial f_{R_t}(z^t)$ . Using Holder's inequality to upper bound the inner-product and  
 879 using the upper bound of Claim 12 for the dual norm of the sub-gradients of  $f_{R_t}$ , we get that

$$f_{R_t}(z^t) \leq f_{R_t}(y^t) + \frac{2n}{\gamma} \cdot \|z^t - y^t\|_{\mathcal{T}}$$

880 and finally from Claim 13 we get that

$$f_{R_t}(z^t) \leq f_{R_t}(y^t) + \frac{2n}{\gamma} \cdot \sqrt{\epsilon \cdot \frac{\eta}{\alpha}}$$

881 • For the moving cost, recall it suffices to use the triangular inequality that  $\|\cdot\|_{\mathcal{T}}$  (as a norm)  
 882 satisfies:

$$\begin{aligned} \|z^t - z^{t-1}\|_{\mathcal{T}} &\leq \|z^t - y^t\|_{\mathcal{T}} + \|y^t - y^{t-1}\|_{\mathcal{T}} + \|y^{t-1} - z^{t-1}\|_{\mathcal{T}} \\ &\leq \|y^t - y^{t-1}\|_{\mathcal{T}} + 2 \cdot \sqrt{\epsilon \cdot \frac{\eta}{\alpha}} \end{aligned}$$

883 The proof of Lemma 4 follows easily by plugging in  $\eta = (\gamma \cdot \sqrt{nT})^{-1}$ ,  $\alpha = (8kD\gamma^2)^{-1}$  and  
 884  $\epsilon = \mathcal{O}(1/\sqrt{T})$ .

## 885 D.5 Implementation of Projected Mirror Descent

886 We conclude this section by considering the *Projected Mirror Descent* update step, namely

$$y' = \arg \min_{y^* \in \mathcal{FP}(\mathcal{T})} [\eta \cdot \langle c, y^* \rangle + D_{R_{\mathcal{T}}}(y^*, y)]$$

887 that takes as input a fractional facility placement  $y \in \mathcal{FP}(\mathcal{T})$  and returns some other  $y' \in \mathcal{FP}(\mathcal{T})$   
 888 that minimizes a linear cost under vector  $c$  plus the Bregman Divergence between the initial and  
 889 the new point under regularizer  $R_{\mathcal{T}}$ . Here,  $\eta > 0$  is a tuning parameter that balances the dynamics  
 890 between the linear cost and the Bregman Divergence.

891 By letting  $c$  be the sub-gradient of the fractional connection cost over the observed sequence of  
 892 clients, we can use this update step in order to approximate the FTRL objective; this is, in fact, the  
 893 implementation we did for our experimental evaluation of Algorithm 2. In this section we will argue  
 894 that the special structure of  $R_{\mathcal{T}}$  allows us to compute the update step in linear (to the size of the HST)  
 895 time.

896 By definition of the Bregman Divergence, we have

$$D_{R_{\mathcal{T}}}(x, y) = R_{\mathcal{T}}(x) - R_{\mathcal{T}}(y) - \langle \nabla R_{\mathcal{T}}(y), x - y \rangle$$

897 Substituting everything, we get that the update step of *Projected Mirror Descent* can be written as

$$y' = \arg \min_{y^* \in \mathcal{FP}(\mathcal{T})} F(y^*)$$

898 for

$$\begin{aligned} F(y^*) &= \eta \cdot \sum_v c_v \cdot y_v^* + \sum_{v \neq r} w_v \cdot (y_v^* + \delta_v) \cdot \ln \left( \frac{y_v^* + \delta_v}{y_{p(v)}^* + \delta_{p(v)}} \right) \\ &\quad - \sum_{v \neq r} w_v \cdot (y_v + \delta_v) \cdot \ln \left( \frac{y_v + \delta_v}{y_{p(v)} + \delta_{p(v)}} \right) \\ &\quad - \sum_{v \neq r} \left( w_v \cdot \ln \left( \frac{y_v + \delta_v}{y_{p(v)} + \delta_{p(v)}} \right) + \frac{w_v}{2} + \frac{w_v}{2} \cdot \mathbb{1}[v \in L(\mathcal{T})] \right) (y_v^* - y_v) \\ &\quad - \frac{w_r}{2} (y_r^* - y_r) \end{aligned}$$

899 It is always the case that we update  $y'$  from some  $y \in \mathcal{FP}(\mathcal{T})$ , so we can simplify the above  
 900 expression to get

$$\begin{aligned} F(y^*) &= \eta \cdot \sum_v c_v \cdot y_v^* + \sum_{v \neq r} w_v \cdot (y_v^* + \delta_v) \cdot \ln \left( \frac{\frac{y_v^* + \delta_v}{y_{p(v)}^* + \delta_{p(v)}}}{\frac{y_v + \delta_v}{y_{p(v)} + \delta_{p(v)}}} \right) \\ &\quad - \sum_v \frac{w_v}{2} \cdot (1 + \mathbb{1}[v \in L(\mathcal{T})]) \cdot (y_v^* - y_v) \end{aligned}$$

901 Recall that by definition,  $\mathcal{FP}(\mathcal{T})$  is the polytope

$$\mathcal{FP}(\mathcal{T}) = \left\{ y \in \mathbb{R}^{|V(\mathcal{T})|} : \begin{array}{ll} y_v = \sum_{u \in \text{cld}(v)} y_u & v \notin L(\mathcal{T}) \\ y_v \in [0, 1] & v \in L(\mathcal{T}) \\ y_r = k \end{array} \right.$$

902 Since our objective is to minimize function  $F(\cdot)$  over  $\mathcal{FP}(\mathcal{T})$ , we can write down the KKT optimality  
903 conditions to obtain the following conditions about the minimizer  $y^*$ :

$$\frac{y_v^* + \delta_v}{y_{p(v)}^* + \delta_{p(v)}} = \frac{y_v + \delta_v}{y_{p(v)} + \delta_{p(v)}} \cdot \exp\left(\frac{1}{w_v}(\mu_{p(v)} - \mu_v - \eta c_v)\right)$$

904 where  $\mu_v$  is the Lagrange multiplier for constraint  $y_v = \sum_{u \in \text{cld}(v)} y_u$  and  $\mu_v = 0$  for  $v \in L(\mathcal{T})$ . To  
905 complete our computation of  $y^*$ , it remains to compute the Lagrange multipliers  $\mu$ .

906 Since  $y^* \in \mathcal{FP}(\mathcal{T})$ , it is not hard to verify that for any  $v \notin L(\mathcal{T})$  it holds

$$\sum_{u \in \text{cld}(v)} \frac{y_u^* + \delta_u}{y_v^* + \delta_v} = 1$$

907 and using the KKT optimality condition, this implies that for any  $v \notin L(\mathcal{T})$

$$\sum_{u \in \text{cld}(v)} \frac{y_u + \delta_u}{y_v + \delta_v} \cdot \exp\left(\frac{1}{w_u}(\mu_v - \mu_u - \eta c_u)\right) = 1$$

908 or equivalently, since  $w_v = 2w_u$  for all  $u \in \text{cld}(v)$ ,

$$\mu_v = -\frac{w_v}{2} \cdot \ln\left(\sum_{u \in \text{cld}(v)} \frac{y_u + \delta_u}{y_v + \delta_v} \cdot \exp\left(-\frac{\mu_u + \eta c_u}{w_u}\right)\right)$$

909 Thus, starting from  $\mu_v = 0$  on the leaves, this expression provides as a bottom-up algorithm to  
910 compute all the Lagrange multipliers  $\mu$ . Using these multipliers and the KKT optimality conditions,  
911 we can then easily compute the ratios

$$\frac{y_v^* + \delta_v}{y_{p(v)}^* + \delta_{p(v)}} = \frac{y_v + \delta_v}{y_{p(v)} + \delta_{p(v)}} \cdot \exp\left(\frac{1}{w_v}(\mu_{p(v)} - \mu_v - \eta c_v)\right)$$

912 for all vertices  $v \neq r$ . Finally, we can start from the root vertex  $r$ , for which we know that  $y_r^* = k$ ,  
913 and cascade these ratios downwards until we reach the leaves and we have compute all entries of  $y^*$ .  
914 Clearly, this is all done in linear time to the number of vertices.

915 Intuitively, this update step can be interpreted as an application of the Multiplicative Weights Update  
916 algorithm on every parent vertex  $v$  that decides how its mass should be split to its children. We repeat  
917 this process in a bottom-up manner, and then we simply start with  $k$  facilities on the root and begin  
918 splitting them based on these ratios while moving downwards.

## E Analysis of Cut&Round (Proofs of Section 5)

In this chapter of the appendix we present all the omitted proofs from Section 5 concerning our online rounding scheme Cut&Round. To avoid repetition, from now on we fix an arbitrary HST  $\mathcal{T}$  and use  $\mathcal{FP}(\mathcal{T})$  to denote the set of all fractional placements of  $k$  facilities on the leaves of  $\mathcal{T}$ .

**Roadmap.** In section E.1, we argue about the correctness of Cut&Round; namely, we show that no matter the input, Cut&Round always returns a set of  $k$ -leaves of  $\mathcal{T}$  where the facilities are placed. Then, in section E.2 we establish the main property of Cut&Round and prove Lemma 5. Finally, in section E.3 we analyze the expected connection cost of Cut&Round's output and prove Item 1 of Theorem 4 (Lemma 6) while in section E.4 we analyze the expected moving cost of Cut&Round's output and prove Item 2 of Theorem 4 (Lemma 7).

### E.1 Correctness of Cut&Round

We begin by proving the correctness of Cut&Round. Fix any  $y \in \mathcal{FP}(\mathcal{T})$  and any set of thresholds  $\alpha \in [0, 1]^{|V(\mathcal{T})|}$ . Let  $F = \text{Cut\&Round}(\mathcal{T}, y, \alpha)$ . In this section, we will prove that  $|F| = k$ , i.e. we will argue that Cut&Round always returns a set of  $k$  leaves at which facilities must be placed, as it is expected to. In order to show this, we will need to analyze the  $Y_v$  variables produced by Cut&Round.

**Claim 14.** *For any leaf  $v \in L(\mathcal{T})$ , it holds that  $Y_v \in \{0, 1\}$ .*

*Proof.* Observe that for any  $v \in V(\mathcal{T})$ , sub-routine Alloc sets  $Y_v$  to either  $\lfloor y_v \rfloor$  or  $\lfloor y_v \rfloor + 1$ . By definition of  $\mathcal{FP}(\mathcal{T})$ , we have  $y_v \in [0, 1]$  for each leaf  $v \in L(\mathcal{T})$ . We distinguish between two different cases. If  $y_v \in [0, 1)$ , then clearly  $Y_v \in \{0, 1\}$ . If  $y_v = 1$ , then  $\delta(y_v) = 0$  and thus Alloc will always set  $Y_v = \lfloor y_v \rfloor = 1$ . Thus, the claim holds for all leaves  $v \in L(\mathcal{T})$ .  $\square$

**Claim 15.** *Let  $v \notin L(\mathcal{T})$  be any non-leaf vertex. Then,  $Y_v = \sum_{u \in \text{cld}(v)} Y_u$ .*

*Proof.* Fix any non-leaf vertex  $v \notin L(\mathcal{T})$ . We will analyze the inner loop of Cut&Round that iterates over  $v$ 's children. Initially, Cut&Round sets  $Y_{rem} = Y_v$  and  $y_{rem} = y_v$ . Then, we proceed to iteratively call Alloc, once per child vertex of  $v$ . Each time Alloc assigns some value  $Y_u$  to a child vertex  $u \in \text{cld}(v)$ , we update  $Y_{rem}$  to  $Y_{rem} - Y_u$ ; thus, to prove our claim it suffices to argue that after we update the last child vertex, we have  $Y_{rem} = 0$ .

Since by definition of sub-routine Alloc we know that  $Y_v \in \{\lfloor y_v \rfloor, \lfloor y_v \rfloor + 1\}$ , we know that initially (before any child vertex is assigned a value  $Y_u$ ) it holds that  $Y_{rem} \in \{\lfloor y_{rem} \rfloor, \lfloor y_{rem} \rfloor + 1\}$ . In fact, a simple case analysis over the decision tree of sub-routine Alloc suffices to see that this invariant holds not only at the beginning, but even after we begin assigning values to the child vertices and update  $Y_{rem}$  and  $y_{rem}$ .

Since  $y \in \mathcal{FP}(\mathcal{T})$ , we know that  $y_v = \sum_{u \in \text{cld}(v)} y_u$  and thus  $y_{rem} = y_u$  at the time we iterate over the last child vertex  $u \in \text{cld}(v)$ . Furthermore, from the above discussion we know that  $Y_{rem} \in \{\lfloor y_u \rfloor, \lfloor y_u \rfloor + 1\}$ . Since  $\delta(y_u) = \delta(y_{rem})$ , it is easy to verify that in any case Alloc sets  $Y_u = Y_{rem}$  and thus after the last update we have  $Y_{rem} = 0$ , as desired.  $\square$

**Proof of Correctness.** Recall that by definition, the output of Cut&Round is  $F = \{v \in L(\mathcal{T}) : Y_v = 1\}$ . Since from Claim 14 we know that  $Y_v \in \{0, 1\}$  for all  $v \in L(\mathcal{T})$ , this implies that  $|F| = \sum_{v \in L(\mathcal{T})} Y_v$ . We apply Claim 15 to the root vertex  $r$ , then again to each  $u \in \text{cld}(r)$  and so on until we reach the leaves. This gives us that  $Y_r = \sum_{v \in L(\mathcal{T})} Y_v$  and thus  $|F| = Y_r$ . Since by definition Cut&Round sets  $Y_r = k$ , we have proven that  $|F| = k$  as desired.

## 960 E.2 Proof of Lemma 5 (Computing the Allocation Probabilities)

961 In this section, we formally prove the main property of algorithm Cut&Round, as stated in Lemma 5.  
 962 Fix any fractional facility placement  $y \in \mathcal{FP}(\mathcal{T})$  and let  $\alpha_v \sim \text{Unif}(0, 1)$  be independent uniformly  
 963 random thresholds for all  $v \in V(\mathcal{T})$ . Let  $F = \text{Cut\&Round}(\mathcal{T}, y, \alpha)$  be the output of algorithm  
 964 Cut&Round on this set of inputs. Recall that algorithm Cut&Round sets the variables  $Y_v$  during its  
 965 execution, for all  $v \in V(\mathcal{T})$ . As we have already discussed,  $Y_v$  is the total number of facilities in  $F$   
 966 on the leaves of the sub-tree rooted at  $v$ , i.e.  $Y_v = |T(v) \cap F|$ . We will prove that for any  $v \in V(\mathcal{T})$ ,  
 967 we have

$$Y_v = \begin{cases} \lfloor y_v \rfloor & \text{with probability } 1 - \delta(y_v) \\ \lfloor y_v \rfloor + 1 & \text{with probability } \delta(y_v) \end{cases}$$

968 We begin by writing down the following property for sub-routine Alloc:

969 **Claim 16.** Fix any fractional facility placement  $y \in \mathcal{FP}(\mathcal{T})$  and let  $\alpha_v \sim \text{Unif}(0, 1)$  for all  
 970  $v \in V(\mathcal{T})$ . For any vertex  $u \in V(\mathcal{T})$  of  $\mathcal{T}$ , let  $Y_u = \text{Alloc}(y_u, y_{rem}, Y_{rem}, \alpha_u)$  be the number of  
 971 facilities assigned to the sub-tree of  $u$  by Line 8 of Algorithm Cut&Round (Algorithm 4). Then,

$$\mathbb{P}_\alpha[Y_u = \lfloor y_u \rfloor] = \begin{cases} 1 & \text{if } Y_{rem} = \lfloor y_{rem} \rfloor \text{ and } \delta(y_u) \leq \delta(y_{rem}) \\ \frac{1 - \delta(y_u)}{1 - \delta(y_{rem})} & \text{if } Y_{rem} = \lfloor y_{rem} \rfloor \text{ and } \delta(y_u) > \delta(y_{rem}) \\ 0 & \text{if } Y_{rem} \neq \lfloor y_{rem} \rfloor \text{ and } \delta(y_u) > \delta(y_{rem}) \\ \frac{\delta(y_{rem}) - \delta(y_u)}{\delta(y_{rem})} & \text{if } Y_{rem} \neq \lfloor y_{rem} \rfloor \text{ and } \delta(y_u) \leq \delta(y_{rem}) \end{cases}$$

972 *Proof.* This claim is a direct consequence of sub-routine Alloc's description (Algorithm 5) and the  
 973 fact that  $\alpha_v \sim \text{Unif}(0, 1)$  for all  $v \in V(\mathcal{T})$ .  $\square$

974 Using this claim, we are now ready to prove Lemma 5.

975 **Proof of Lemma 5.** We prove the lemma via a top-down induction on the vertices of  $\mathcal{T}$  (decreasing  
 976 level order). For the root vertex, we know that since  $y \in \mathcal{FP}(\mathcal{T})$  we have  $y_r = k$  and also by  
 977 definition of Cut&Round we have  $Y_r = k$ . Thus, we get that  $Y_r = y_r = \lfloor y_r \rfloor$  with probability  
 978  $1 - \delta(y_r) = 1$  and the claim holds. Now, fix any non-leaf vertex  $v \notin L(\mathcal{T})$  and assume that  $Y_v = \lfloor y_v \rfloor$   
 979 with probability  $1 - \delta(y_v)$  and  $Y_v = \lfloor y_v \rfloor + 1$  with probability  $\delta(y_v)$ . To complete our induction, we  
 980 will now proceed to prove the claim for all the children vertices of  $v$ .

981 We begin by proving the claim for the first child of vertex  $v$ , and then we will show how the same  
 982 arguments extend for all its children. Let  $u \in \text{cld}(v)$  be the first child vertex of  $v$  that Cut&Round  
 983 iterates over. Then, by definition of Cut&Round we have that  $Y_{rem} = Y_v$  and  $y_{rem} = y_v$ . Using  
 984 the inductive hypothesis on  $v$ , this implies that  $Y_{rem} = \lfloor y_{rem} \rfloor$  with probability  $1 - \delta(y_{rem})$  and  
 985  $Y_{rem} = \lfloor y_{rem} \rfloor + 1$  with probability  $\delta(y_{rem})$ . Conditioning on the value of  $Y_{rem}$ , we get

$$\begin{aligned} \mathbb{P}_\alpha[Y_u = \lfloor y_u \rfloor] &= \mathbb{P}_\alpha[Y_u = \lfloor y_u \rfloor \mid Y_{rem} = \lfloor y_{rem} \rfloor] \cdot (1 - \delta(y_{rem})) \\ &\quad + \mathbb{P}_\alpha[Y_u = \lfloor y_u \rfloor \mid Y_{rem} = \lfloor y_{rem} \rfloor + 1] \cdot \delta(y_{rem}) \end{aligned}$$

We distinguish between two different cases based on whether  $\delta(y_u) \leq \delta(y_{rem})$  or  $\delta(y_u) > \delta(y_{rem})$ .  
 In any case, we can use Claim 16 to substitute the conditional probabilities on the above expression  
 and easily get that

$$\mathbb{P}_\alpha[Y_u = \lfloor y_u \rfloor] = 1 - \delta(y_u)$$

986 Thus, we have already proven the claim for the first child of  $v$ . However, to complete our induction,  
 987 we need to prove the claim for all children of  $v$  and not just the first one. The only property that we  
 988 used and holds specifically for the first child was that  $Y_{rem} = \lfloor y_{rem} \rfloor$  with probability  $1 - \delta(y_{rem})$   
 989 and  $Y_{rem} = \lfloor y_{rem} \rfloor + 1$  with probability  $\delta(y_{rem})$ . Let  $Y'_{rem}$  and  $y'_{rem}$  be the updated remaining  
 990 facilities after the value  $Y_u$  of the first child has been assigned. If we can prove that  $Y'_{rem} = \lfloor y'_{rem} \rfloor$   
 991 with probability  $1 - \delta(y'_{rem})$  and  $Y'_{rem} = \lfloor y'_{rem} \rfloor + 1$  with probability  $\delta(y'_{rem})$ , then we can keep  
 992 applying the same argument and inductively prove the claim for all the children of  $v$ .

993 By definition, we have that  $Y'_{rem} = Y_{rem} - Y_u$  and  $y'_{rem} = y_{rem} - y_u$ . Once again, we distinguish  
 994 between two different cases.

995 • Let  $\delta(y_u) \leq \delta(y_{rem})$ . In that case, we get that  $\lfloor y'_{rem} \rfloor = \lfloor y_{rem} \rfloor - \lfloor y_u \rfloor$  and also that  
 996  $\delta(y'_{rem}) = \delta(y_{rem}) - \delta(y_u)$ . Since we know that  $Y_{rem} \in \{\lfloor y_{rem} \rfloor, \lfloor y_{rem} \rfloor + 1\}$  and  
 997  $Y_u \in \{\lfloor y_u \rfloor, \lfloor y_u \rfloor + 1\}$ , this implies that

$$\begin{aligned} \mathbb{P}_\alpha[Y'_{rem} = \lfloor y'_{rem} \rfloor] &= \mathbb{P}_\alpha[Y_{rem} = \lfloor y_{rem} \rfloor \cap Y_u = \lfloor y_u \rfloor] \\ &\quad + \mathbb{P}_\alpha[Y_{rem} = \lfloor y_{rem} \rfloor + 1 \cap Y_u = \lfloor y_u \rfloor + 1] \end{aligned}$$

998 Using conditional probabilities and the inductive hypothesis on the distribution of  $Y_{rem}$ , we  
 999 obtain

$$\begin{aligned} \mathbb{P}_\alpha[Y'_{rem} = \lfloor y'_{rem} \rfloor] &= \mathbb{P}_\alpha[Y_u = \lfloor y_u \rfloor \mid Y_{rem} = \lfloor y_{rem} \rfloor] \cdot (1 - \delta(y_{rem})) \\ &\quad + \mathbb{P}_\alpha[Y_u = \lfloor y_u \rfloor + 1 \mid Y_{rem} = \lfloor y_{rem} \rfloor + 1] \cdot \delta(y_{rem}) \end{aligned}$$

Using Claim 16 to substitute the conditional probabilities, we finally get

$$\mathbb{P}_\alpha[Y'_{rem} = \lfloor y'_{rem} \rfloor] = 1 - \delta(y_{rem}) + \delta(y_u) = 1 - \delta(y'_{rem})$$

1000 as desired.

• Let  $\delta(y_u) > \delta(y_{rem})$ . In that case, we get that  $\lfloor y'_{rem} \rfloor = \lfloor y_{rem} \rfloor - \lfloor y_u \rfloor - 1$  and also that  
 $\delta(y'_{rem}) = 1 + \delta(y_{rem}) - \delta(y_u)$ . Since we know that  $Y_{rem} \in \{\lfloor y_{rem} \rfloor, \lfloor y_{rem} \rfloor + 1\}$  and  
 $Y_u \in \{\lfloor y_u \rfloor, \lfloor y_u \rfloor + 1\}$ , this implies that

$$\mathbb{P}_\alpha[Y'_{rem} = \lfloor y'_{rem} \rfloor] = \mathbb{P}_\alpha[Y_{rem} = \lfloor y_{rem} \rfloor \cap Y_u = \lfloor y_u \rfloor + 1]$$

Using conditional probabilities and the inductive hypothesis on the distribution of  $Y_{rem}$ , we  
 obtain

$$\mathbb{P}_\alpha[Y'_{rem} = \lfloor y'_{rem} \rfloor] = \mathbb{P}_\alpha[Y_u = \lfloor y_u \rfloor + 1 \mid Y_{rem} = \lfloor y_{rem} \rfloor] \cdot (1 - \delta(y_{rem}))$$

Using Claim 16 to substitute the conditional probabilities, we finally get

$$\mathbb{P}_\alpha[Y'_{rem} = \lfloor y'_{rem} \rfloor] = \delta(y_u) - \delta(y_{rem}) = 1 - \delta(y'_{rem})$$

1001 as desired.

1002 Thus, we have concluded the proof of Lemma 5.

### 1003 E.3 Proof of Item 1 in Theorem 4 (Bounding the Expected Connection Cost)

1004 **Lemma 6.** Let  $F = \text{Cut\&Round}(y, \alpha)$  where for all  $v \in V(\mathcal{T})$ ,  $\alpha_v \sim \text{Unif}(0, 1)$  independently.  
 1005 Then,

$$\mathbb{E}_\alpha[C_R(F)] = f_R(y) \text{ for any } R \subseteq L(\mathcal{T})$$

1006 *Proof.* Fix any  $y \in \mathcal{FP}(\mathcal{T})$  and let  $\alpha \in [0, 1]^{|V(\mathcal{T})|}$  be a set of thresholds such that for each  
 1007  $v \in V(\mathcal{T})$ ,  $\alpha_v$  is drawn independently at random from the uniform distribution, i.e.  $\alpha_v \sim \text{Unif}(0, 1)$ .  
 1008 Let  $F = \text{Cut\&Round}(\mathcal{T}, y, \alpha)$ . We will prove that for any set of clients  $R \subseteq L(\mathcal{T})$ , it holds that  
 1009  $\mathbb{E}_\alpha[C_R(F)] = f_R(y)$ .

1010 Recall that the  $Y_v$  variables set by  $\text{Cut\&Round}$  denote the total number of facilities in  $F$  that are  
 1011 placed on the sub-tree rooted at vertex  $v$ , i.e.  $Y_v = |F \cap T(v)|$ . As argued in section E.1, we know  
 1012 that  $Y \in \mathcal{FP}(\mathcal{T}) \cap \mathbb{N}$ , i.e.  $Y$  is a valid integral facility placement. Thus, from Claim 1 of section C.1,  
 1013 we know that  $C_R(F) = f_R(Y)$ . This implies that by definition of the fractional connection cost  
 1014 under client request  $R$ , we have that

$$C_R(F) = \sum_{j \in R} \sum_{v \in P(j, r)} 2^{\text{lev}(v)+1} \cdot \max(0, 1 - Y_v)$$

1015 Thus, we get

$$\begin{aligned} \mathbb{E}_\alpha[C_R(F)] &= \sum_{j \in R} \sum_{v \in P(j, r)} 2^{\text{lev}(v)+1} \cdot \mathbb{E}_\alpha[\max(0, 1 - Y_v)] \\ &= \sum_{j \in R} \sum_{v \in P(j, r)} 2^{\text{lev}(v)+1} \cdot \mathbb{P}_\alpha[Y_v = 0] \end{aligned}$$



where the first equality holds by linearity of expectation, and the second equality holds by the fact that  $Y_v \in \mathbb{N}$  for all  $v \in V(\mathcal{T})$ . Since  $Y_v \in \{\lfloor y_v \rfloor, \lfloor y_v \rfloor + 1\}$ , we know that for any  $v \in V(\mathcal{T})$ ,  $Y_v$  can be 0 only if  $y_v \in [0, 1)$ . Furthermore, from Lemma 5, we know that in the case of uniformly random thresholds, this happens with probability precisely  $1 - y_v$ . Combining these facts, we get  $\mathbb{P}_\alpha[Y_v = 0] = \max(0, 1 - y_v)$  and thus

$$\begin{aligned}\mathbb{E}_\alpha[C_R(F)] &= \sum_{j \in R} \sum_{v \in P(j, r)} 2^{\text{lev}(v)+1} \cdot \max(0, 1 - y_v) \\ &= f_R(y)\end{aligned}$$

concluding the proof of Lemma 6.  $\square$

#### E.4 Proof of Item 2 in Theorem 4 (Bounding the Expected Moving Cost)

**Lemma 7.** *Let  $F = \text{Round\&Cut}(y, \alpha)$  and also let  $F' = \text{Round\&Cut}(\mathcal{T}, y', \alpha)$  where  $\alpha_v \sim \text{Unif}(0, 1)$  for all  $v \in V(\mathcal{T})$ . Then,*

$$\gamma \cdot \mathbb{E}_\alpha [M_{\mathcal{T}}(F, F')] \leq 4 \cdot \|y - y'\|_{\mathcal{T}}$$

**Proof.** Fix any pair of fractional facility placements  $y, y' \in \mathcal{FP}(\mathcal{T})$  and let corresponding outputs of  $\text{Cut\&Round}$  be denoted as  $F = \text{Cut\&Round}(\mathcal{T}, y, \alpha)$  and  $F' = \text{Cut\&Round}(\mathcal{T}, y', \alpha)$ . Observe that the same set of (uniformly random) thresholds  $\alpha_v$  is used in both cases, as this will play a crucial part in our analysis. To prove Lemma 7, we need to prove that

$$\gamma \cdot \mathbb{E}_\alpha [M_{\mathcal{T}}(F, F')] \leq 4 \cdot \|y - y'\|_{\mathcal{T}}$$

where the expectation is taken over the value of the uniformly random thresholds  $\alpha_v$ .

The proof of Lemma 7 is technically involved, and thus we will break down our approach into smaller sections to ease the presentation. We begin by proving the Lemma in the special case where the transition from  $y$  to  $y'$  has a very simple structure, which we now proceed to define:

**Definition 10.** *We say that two fractional facility placements  $y, y' \in \mathcal{FP}(\mathcal{T})$  are  $\epsilon$ -neighboring if there are two leaves  $s, t \in L(\mathcal{T})$  with least common ancestor  $p \in V(\mathcal{T})$  such that the following hold:*

1.  $y'_v = y_v - \epsilon$  for all  $v \in P(s, p) \setminus \{p\}$ .
2.  $y'_v = y_v + \epsilon$  for all  $v \in P(t, p) \setminus \{p\}$ .
3.  $y'_v = y_v$  for all other  $v \in V(\mathcal{T})$ .

Furthermore, we say that  $y, y'$  are strictly  $\epsilon$ -neighboring if  $\epsilon$  is sufficiently small to satisfy

1.  $\epsilon \leq \delta(y_v)$  for all  $v \in P(s, p) \setminus \{p\}$  with  $\delta(y_v) > 0$ .
2.  $\epsilon \leq 1 - \delta(y_v)$  for all  $v \in P(t, p) \setminus \{p\}$  with  $\delta(y_v) > 0$ .
3.  $\epsilon < 1$ .

Basically, if  $y$  and  $y'$  are  $\epsilon$ -neighboring then  $y'$  is obtained by pushing  $\epsilon$ -mass on  $y$  from  $s$  to  $t$  along the unique path that connects these two leaves. Furthermore, if  $\epsilon$  is sufficiently small so that for any  $v \in V(\mathcal{T})$  either  $\lfloor y_v \rfloor = \lfloor y'_v \rfloor$  or  $|y_v - y'_v| \leq 1$  and at least one of the two is integral, then we say that the two fractional facility placements are *strictly*  $\epsilon$ -neighboring. As we will shortly argue, Lemma 7 holds in the special case where  $y, y'$  are strictly  $\epsilon$ -neighboring.

**Claim 17.** *If  $y, y' \in \mathcal{FP}(\mathcal{T})$  are strictly  $\epsilon$ -neighboring for some  $\epsilon \geq 0$ , then*

$$\gamma \cdot \mathbb{E}_\alpha [M_{\mathcal{T}}(F, F')] \leq 4 \cdot \|y - y'\|_{\mathcal{T}}.$$

Before proving Claim 17, let us first show why it suffices to argue about the general case and prove Lemma 7. Let  $y, y' \in \mathcal{FP}(\mathcal{T})$  be any two fractional placements. Recall that  $\|y - y'\|_{\mathcal{T}}$  captures precisely the minimum transportation cost from  $y$  to  $y'$  on  $\mathcal{T}$ . If we break down this transportation plan into small movements of masses between leaves, then we can view it as a sequence of transitions between strictly  $\epsilon$ -neighboring placements. This is formalized in the following claim:

1053 **Claim 18.** For any  $y, y' \in \mathcal{FP}(\mathcal{T})$ , there exists a finite sequence  $y_0, y_1, \dots, y_m \in \mathcal{FP}(\mathcal{T})$  of  
 1054 fractional facility placements with  $y = y_0$  and  $y' = y_m$  such that

- 1055 1.  $y_j, y_{j+1}$  are strictly  $\epsilon$ -neighboring for some  $\epsilon \geq 0$  for  $j = 0, 1, \dots, m-1$ .  
 1056 2.  $\|y - y'\|_{\mathcal{T}} = \sum_{j=1}^m \|y_j - y_{j-1}\|_{\mathcal{T}}$ .

1057 We will now prove Lemma 7. Let  $F_j = \text{Cut\&Round}(\mathcal{T}, y_j, \alpha)$  be the corresponding output of  
 1058 Cut&Round on  $y_j$  using the same (uniformly random) thresholds  $\alpha_v$ . Then,

$$\begin{aligned} \gamma \cdot \mathbb{E}_{\alpha} [M_{\mathcal{T}}(F, F')] &\leq \gamma \cdot \mathbb{E}_{\alpha} \left[ \sum_{j=0}^{m-1} M_{\mathcal{T}}(F_j, F_{j+1}) \right] \\ &= \gamma \cdot \sum_{j=0}^{m-1} \mathbb{E}_{\alpha} [M_{\mathcal{T}}(F_j, F_{j+1})] \\ &\leq 4 \cdot \sum_{j=0}^{m-1} \|y_j - y_{j+1}\|_{\mathcal{T}} \\ &= 4 \cdot \|y - y'\|_{\mathcal{T}} \end{aligned}$$

1059 In the above calculation, the first inequality holds from the fact that the minimum transportation cost  
 1060 satisfies the triangular inequality. The first equality holds from linearity of expectation. The second  
 1061 inequality holds from Claim 17 and the second equality holds from Claim 18.

1062 Thus, we have shown that proving Lemma 7 for the special case of strictly  $\epsilon$ -neighboring fractional  
 1063 facility placements  $y, y'$  suffices to prove Lemma 7 for the general case of any  $y, y' \in \mathcal{FP}(\mathcal{T})$  and  
 1064 conclude this section. The rest of this section is dedicated to proving Claim 17, which is the main  
 1065 technical challenge towards proving Lemma 7.

**Proof of Claim 17.** Fix any pair of strictly  $\epsilon$ -neighboring fractional facility placements  $y, y' \in \mathcal{FP}(\mathcal{T})$  and let the corresponding outputs of Cut&Round be  $F = \text{Cut\&Round}(\mathcal{T}, y, \alpha)$  and  $F' = \text{Cut\&Round}(\mathcal{T}, y', \alpha)$ . In section E.1 we have already shown that  $F, F' \subseteq L(\mathcal{T})$  are valid facility placements since  $|F| = |F'| = k$ . Let  $Y, Y' \in \mathcal{FP}(\mathcal{T})$  be used to denote the corresponding integral placements, i.e.

$Y_v := |L(\mathcal{T}) \cap F|$  = number of facilities in  $F$  placed on the leaves of the sub-tree rooted at  $v$   
 and

$Y'_v := |L(\mathcal{T}) \cap F'|$  = number of facilities in  $F'$  placed on the leaves of the sub-tree rooted at  $v$

Recall that  $Y$  and  $Y'$  are precisely the values of the  $Y$ -variables that algorithm Cut&Round sets. As shown in Claim 2 of Section E.4, we know that  $\gamma \cdot M_{\mathcal{T}}(F, F') = \|Y - Y'\|_{\mathcal{T}}$ . Thus, in order to prove Claim 17, we need to show that

$$\mathbb{E}_{\alpha} [\|Y - Y'\|_{\mathcal{T}}] \leq 4 \cdot \|y - y'\|_{\mathcal{T}}$$

1066 Since  $y, y'$  are strictly  $\epsilon$ -neighboring fractional facility placements, we know that there exist two  
 1067 leaves  $s, t \in L(\mathcal{T})$  with lowest common ancestor  $p \in V(\mathcal{T})$  such that  $|y_v - y'_v|$  is  $\epsilon$  among vertices  
 1068 on the (unique) path from  $s$  to  $t$  (excluding vertex  $p$ ) and is 0 otherwise. Let  $L = \text{lev}(p)$ . Then, by  
 1069 definition of  $\|\cdot\|_{\mathcal{T}}$  we have

$$\|y - y'\|_{\mathcal{T}} = \sum_{v \in V(\mathcal{T})} 2^{\text{lev}(v)} \cdot |y_v - y'_v| = 2\epsilon \cdot \sum_{l=0}^{L-1} 2^l = 2\epsilon \cdot (2^L - 1) \quad (5)$$

1070 Furthermore, recall that from Lemma 5, Cut&Round rounds  $y_v$  to either  $Y_v = \lfloor y_v \rfloor + 1$  with  
 1071 probability  $\delta(y_v)$  or to  $\lfloor y_v \rfloor$  with probability  $1 - \delta(y_v)$ . Since  $\epsilon$  is sufficiently small so that either  
 1072  $\lfloor y_v \rfloor = \lfloor y'_v \rfloor$  or  $|y_v - y'_v| \leq 1$  and at lowest one of the two is integral (and it is thus always rounded  
 1073 to itself), we get that  $|Y_v - Y'_v| \leq 1$  for all  $v \in V(\mathcal{T})$ . This implies that

$$\begin{aligned}
\mathbb{E}_\alpha [\|Y - Y'\|_\mathcal{T}] &= \mathbb{E}_\alpha \left[ \sum_{v \in V(\mathcal{T})} 2^{\text{lev}(v)} \cdot |Y_v - Y'_v| \right] \\
&= \sum_{v \in V(\mathcal{T})} 2^{\text{lev}(v)} \cdot \mathbb{E}_\alpha [|Y_v - Y'_v|] \\
&= \sum_{v \in V(\mathcal{T})} 2^{\text{lev}(v)} \cdot \mathbb{P}_\alpha [|Y_v - Y'_v| = 1]
\end{aligned}$$

Let  $l \in [0, h(\mathcal{T})]$  be any level on the HST  $\mathcal{T}$  and let  $C_l$  be used to denote the expected number of vertices at level  $l$  that are rounded to different values, i.e.

$$C_l := \mathbb{E}_\alpha [\|\{v \in V(\mathcal{T}) : \text{lev}(v) = l \text{ and } Y_v \neq Y'_v\}\|]$$

Then, the above imply that

$$\mathbb{E}_\alpha [\|Y - Y'\|_\mathcal{T}] = \sum_{l=0}^{h(\mathcal{T})} 2^l \cdot C_l \quad (6)$$

It remains to compute  $C_l$  for all  $l \in [0, h(\mathcal{T})]$ . This is done in Claim 19, where we prove that  $C_l = 0$  for  $l \geq L$  (the level of  $s$  and  $t$ 's lowest common ancestor) and  $C_l \leq 4\epsilon \cdot (L - l)$  otherwise. Combining this claim with equations (5) and (6) immediately implies that

$$\mathbb{E}_\alpha [\|Y - Y'\|_\mathcal{T}] \leq 4 \cdot \|y - y'\|_\mathcal{T}$$

which completes the proof of Claim 17.

**Claim 19.** For any  $l \geq L$ ,  $C_l = 0$ . For any  $l < L$ ,  $C_l \leq 4\epsilon \cdot (L - l)$ .

*Proof.* Recall that for fixed thresholds  $\alpha_v$ , the output of Cut&Round is deterministic. Since  $L$  is the level of vertex  $p$  (the lowest common ancestor of leaves  $s, t$ ) and by definition of strictly  $\epsilon$ -neighboring placements  $y, y'$  we know  $y_v = y'_v$  for any vertex  $v$  such that  $\text{lev}(v) \geq L$ , we immediately get that  $C_l = 0$  for any  $l \geq L$ .

We will now proceed to analyze  $C_l$  for any  $l < L$ . We partition the set of vertices  $v \in V(\mathcal{T})$  with  $\text{lev}(v) = l$  into three sets:

- A vertex  $v$  is called *active* if it lies on the (unique) path between leaves  $s$  and  $t$ .
- A vertex  $v$  is called *inactive* if it is not a descendant of  $p$  (the lowest common ancestor of leaves  $s$  and  $t$ ).
- A vertex  $v$  is called *affected* if it is not active and is a descendant of  $p$ .

Obviously, each vertex  $v$  with  $\text{lev}(v) = l$  must lie in exactly one of these sets.

**Inactive Vertices.** We will prove that for every inactive vertex  $v$ ,  $\mathbb{P}_\alpha [Y_v \neq Y'_v] = 0$ . Since the same set of thresholds  $\alpha$  is used to round both  $y$  and  $y'$ , the output of Cut&Round is deterministic. Furthermore, if a vertex  $v$  is inactive, then we know that  $y_v = y'_v$  and also  $y_u = y'_u$  for any ancestor vertex of  $u$  of  $v$  (by Definition 10 of neighboring facility placements). Thus, this immediately implies that  $Y_v = Y'_v$  with probability 1 and thus we do not need to account for inactive vertices when computing  $C_l$ .

**Active Vertices.** We will prove that for every active vertex  $v$ ,  $\mathbb{P}_\alpha [Y_v \neq Y'_v] = \epsilon$ . Recall that any active vertex is either an ancestor of leaf  $s$  or leaf  $t$ . We will only prove the claim in the case when  $v$  is an ancestor of  $t$ ; the other case is completely analogous. A formal proof by induction is given in Claim 20, presented at the end of this section. As a direct corollary, since there are only two active vertices per level, the expected number of active vertices in level  $l$  that are rounded two different values is precisely  $2\epsilon$ .

**Affected Vertices.** Finally, we will now analyze the affected vertices. By definition, we know that each affected vertex  $v$  will have a unique active ancestor (also counting  $p$ ). We partition the set of affected vertices on level  $l$  into  $2(L - l - 1) + 1$  groups, based on their corresponding active ancestor. The main argument we need to establish is that by definition of Round&Cut, at most one vertex in each of these groups can be rounded to a different value.

To see this, observe that Round&Cut is monotone, in the sense that if  $y'_v \geq y_v$  and also  $y'_u \geq y_u$  for all ancestors  $u$  of  $v$ , then (assuming the same set of thresholds is used), we know that  $Y'_v \geq Y_v$ . Using this fact on the vertices of a group, since all of them can either only increase or decrease, in order to maintain balance at most one of them can change, otherwise we would get a change of 2 or more on the parent node which cannot happen.

Furthermore, for a specific group, if both the common active ancestor and its child  $u$  with  $y_u \neq y'_u$  end up rounded to the same value, we get (from the fact that the same thresholds are used) that all the vertices in the group will be rounded to the same value. Thus, in order for a (unique) vertex in any group to change, at least one of two active vertices must change, which happens with probability at most  $2\epsilon$ . Since there are  $2(L - l - 1) + 1$  groups, we get as a corollary that the expected number of affected vertices at level  $l$  that get rounded to a different value is at most  $2\epsilon \cdot (2L - 2l - 1)$ .

Combining everything, we get that  $C_l \leq 0 + 2\epsilon + 2\epsilon \cdot (2L - 2l - 1) = 4\epsilon \cdot (L - l)$ .  $\square$

**Claim 20.** *Let  $v$  be any active vertex that is an ancestor of  $t$ . Then,  $\mathbb{P}_\alpha[Y_v \neq Y'_v] = \epsilon$ .*

*Proof.* In fact, we will in fact prove the following stronger claim,

- $\mathbb{P}_\alpha[Y_v = \lfloor y_v \rfloor \text{ and } Y'_v = \lfloor y_v \rfloor] = 1 - \delta(y_v) - \epsilon$ .
- $\mathbb{P}_\alpha[Y_v = \lfloor y_v \rfloor \text{ and } Y'_v = \lfloor y_v \rfloor + 1] = \epsilon$ .
- $\mathbb{P}_\alpha[Y_v = \lfloor y_v \rfloor + 1 \text{ and } Y'_v = \lfloor y_v \rfloor] = 0$
- $\mathbb{P}_\alpha[Y_v = \lfloor y_v \rfloor + 1 \text{ and } Y'_v = \lfloor y_v \rfloor + 1] = \delta(y_v)$

which clearly implies Claim 20.

Once again, we will prove the claim via induction, starting from the highest active ancestor of  $t$  at level  $l = L - 1$  and moving towards the leaf  $t$  at level  $l = 0$ . We begin by mentioning that for vertex  $p$  ( $s$  and  $t$ 's lowest common ancestor at level  $L$ ) we know for sure that  $Y_p = Y'_p$  since  $y_p = y'_p$  and  $y_u = y'_u$  for any  $u$  such that  $\text{lev}(u) \geq L$ ; thus, since the same set of thresholds  $\alpha$  is used, the execution of Cut&Round will be identical up to this point.

We assume that the first child of any vertex  $v$  visited by Alloc is always the active child; this can be done without loss of generality as the order that Alloc visits the vertices hasn't played any part on our analysis yet.

**Base of the induction.** For the base of the induction, let  $v$  be the (unique) child of  $p$  that is an ancestor of  $t$ ; i.e. let  $v$  be the highest active ancestor of  $t$ . We have already mentioned that  $Y_p = Y'_p$  with probability 1. Thus, it can either be the case that  $Y_p = Y'_p = \lfloor y_p \rfloor$  or  $Y_p = Y'_p = \lfloor y_p \rfloor + 1$ . From Lemma 5 we know that the first happens with probability  $1 - \delta(y_p)$  and the latter with probability  $\delta(y_p)$ . We distinguish between the following cases:

- Let  $\delta(y_v) < \delta(y_p)$ . Then, if  $Y_p = Y'_p = \lfloor y_p \rfloor$  we know from the description of Alloc that  $Y_v = Y'_v = \lfloor y_v \rfloor$  with probability 1. On the other hand, if  $Y_p = Y'_p = \lfloor y_p \rfloor + 1$ , we know that  $Y_v = \lfloor y_v \rfloor + 1$  if  $\alpha_v \leq \delta(y_v)/\delta(y_p)$  and likewise  $Y'_v = \lfloor y_v \rfloor + 1$  if  $\alpha_v \leq (\delta(y_v) + \epsilon)/(\delta(y_p))$ . Thus, by conditioning on the values of  $Y_p$  and  $Y'_p$ , we get

1.  $\mathbb{P}_\alpha[Y_v = \lfloor y_v \rfloor \text{ and } Y'_v = \lfloor y_v \rfloor] = (1 - \delta(y_p)) \cdot 1 + \delta(y_p) \cdot (1 - \frac{\delta(y_v) + \epsilon}{\delta(y_p)}) = 1 - \delta(y_v) - \epsilon$ .
2.  $\mathbb{P}_\alpha[Y_v = \lfloor y_v \rfloor \text{ and } Y'_v = \lfloor y_v \rfloor + 1] = (1 - \delta(y_p)) \cdot 0 + \delta(y_p) \cdot (\frac{\delta(y_v) + \epsilon}{\delta(y_p)} - \frac{\delta(y_v)}{\delta(y_p)}) = \epsilon$ .
3.  $\mathbb{P}_\alpha[Y_v = \lfloor y_v \rfloor + 1 \text{ and } Y'_v = \lfloor y_v \rfloor] = (1 - \delta(y_p)) \cdot 0 + \delta(y_p) \cdot 0 = 0$ .

- 1147 4.  $\mathbb{P}_\alpha[Y_v = \lfloor y_v \rfloor + 1 \text{ and } Y'_v = \lfloor y_v \rfloor + 1] = (1 - \delta(y_p)) \cdot 0 + \delta(y_p) \cdot \frac{\delta(y_v)}{\delta(y_p)} = \delta(y_v)$ .
- 1148 • Let  $\delta(y_v) \geq \delta(y_p)$ . Then, if  $Y_p = Y'_p = \lfloor y_p \rfloor + 1$  we know from the description of Alloc  
 1149 that  $Y_v = Y'_v = \lfloor y_v \rfloor + 1$  with probability 1. On the other hand, if  $Y_p = Y'_p = \lfloor y_p \rfloor$ , we  
 1150 know that  $Y_v = \lfloor y_v \rfloor + 1$  if  $\alpha_v \leq (\delta(y_v) - \delta(y_p))/(1 - \delta(y_p))$  and likewise  $Y'_v = \lfloor y_v \rfloor + 1$   
 1151 if  $\alpha_v \leq (\delta(y_v) + \epsilon - \delta(y_p))/(1 - \delta(y_p))$ . Thus, by conditioning on the values of  $Y_p$  and  
 1152  $Y'_p$ , we get
- 1153 1.  $\mathbb{P}_\alpha[Y_v = \lfloor y_v \rfloor \text{ and } Y'_v = \lfloor y_v \rfloor] = (1 - \delta(y_p)) \cdot (1 - \frac{\delta(y_v) + \epsilon - \delta(y_p)}{1 - \delta(y_p)}) + \delta(y_p) \cdot 0 =$   
 1154  $1 - \delta(y_v) - \epsilon$ .
- 1155 2.  $\mathbb{P}_\alpha[Y_v = \lfloor y_v \rfloor \text{ and } Y'_v = \lfloor y_v \rfloor] = (1 - \delta(y_p)) \cdot (\frac{\delta(y_v) + \epsilon - \delta(y_p)}{1 - \delta(y_p)} - \frac{\delta(y_v) - \delta(y_p)}{1 - \delta(y_p)}) + \delta(y_p) \cdot$   
 1156  $0 = \epsilon$ .
- 1157 3.  $\mathbb{P}_\alpha[Y_v = \lfloor y_v \rfloor + 1 \text{ and } Y'_v = \lfloor y_v \rfloor] = (1 - \delta(y_p)) \cdot 0 + \delta(y_p) \cdot 0 = 1 - \delta(y_v) = 0$ .
- 1158 4.  $\mathbb{P}_\alpha[Y_v = \lfloor y_v \rfloor + 1 \text{ and } Y'_v = \lfloor y_v \rfloor] = (1 - \delta(y_p)) \cdot \frac{\delta(y_v) - \delta(y_p)}{1 - \delta(y_p)} + \delta(y_p) \cdot 1\delta(y_v)$ .

1159 So in both cases, the base of the induction holds.

1160 **Inductive Step.** Using the exact same approach, we can prove the claim for any active ancestor  
 1161  $u$  of  $t$ , assuming that the claim holds for  $u$ 's father  $v = p(u)$ . The only difference, is that now we  
 1162 can't claim that  $Y_v = Y'_v$  with probability 1. Instead, there are three different cases that we need to  
 1163 consider; namely

- 1164 1.  $Y_v = Y'_v = \lfloor y_v \rfloor$  with probability  $1 - \epsilon - \delta(y_v)$ .
- 1165 2.  $Y_v = Y'_v = \lfloor y_v \rfloor + 1$  with probability  $\delta(y_v)$ .
- 1166 3.  $Y_v = \lfloor y_v \rfloor$  and  $Y'_v = \lfloor y_v \rfloor + 1$  with probability  $\epsilon$ .

1167 where the probabilities hold from the inductive hypothesis on the parent vertex  $v$ . Next, we will need  
 1168 to once again consider the case of whether  $\delta(y_u) < \delta(y_v)$  or not (notice that the same relation will  
 1169 hold for  $y'_u$  and  $y'_v$ ) and use the description of Alloc to get the assignment probabilities. Since this is  
 1170 a simple matter of arithmetic, the details are omitted.  $\square$

## 1171 F Experimental Evaluation

1172 In this section we experimentally evaluate the performance of Algorithm 2 with respect to the best  
 1173 fixed facility placement and compare it with the respective performance of the algorithm proposed by  
 1174 [30]. In all the following experiments the step-size of Algorithm 3 (subroutine of Algorithm 2) is set  
 1175 to  $\eta := \max(\gamma, 1)\sqrt{nT}$ . All the code was written in Python and is included in the supplementary  
 1176 material.

1177 **Periodically Moving Clients.** We first present a simple setting to indicate the inefficiency of the  
 1178 online learning algorithm of [30] in handling moving costs. In this experiment the underlying graph  
 1179 is the 0.01-discretization of  $[0, 1] \times [0, 1]$ . At each round  $t \geq 1$ , we periodically select one of four  
 1180 balls of radius  $R = 0.2$  depicted in Figure 1 and then a client arrives uniformly at random on the  
 1181 selected ball. In Figure 1 and Table 1 we present the overall cost of Algorithm 2 and the algorithm of  
 1182 [30] for different values of facility-weight  $\gamma$ ,  $k = 3$  facilities and  $T = 4000$  time-steps. In all cases,  
 1183 the facilities of Algorithm 2 eventually converge to three of the four ball-centers, which is the optimal  
 1184 fixed facility placement. As the experiment reveals, the algorithm of [30] admits significantly larger  
 cost as the facility-weight increases while Algorithm 2 is robust to the increase.

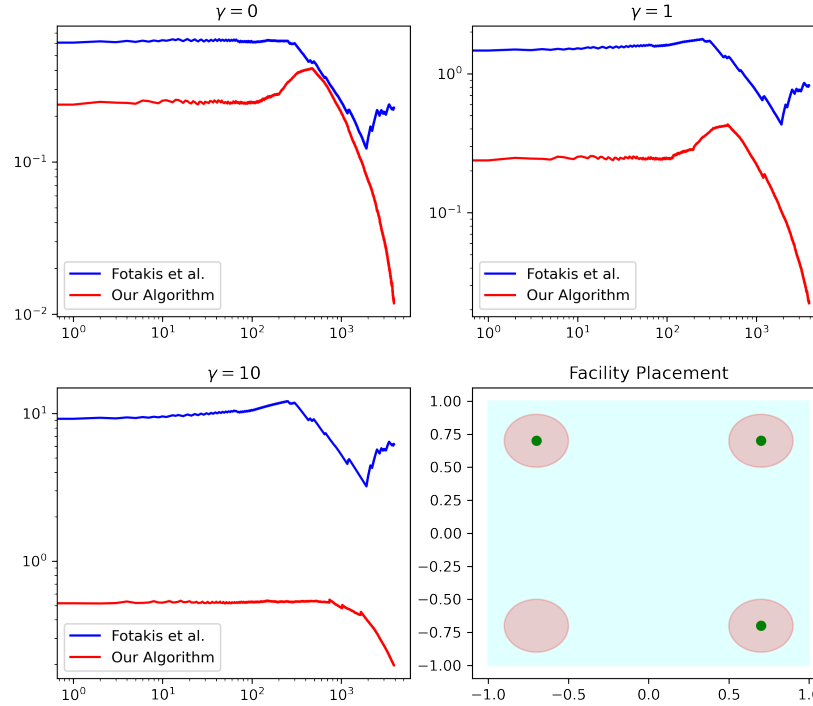

Figure 1: We plot the evolution of the approximation ratio for Algorithm 2 (red curve) and the algorithm from [30] (blue curve) compared to the hindsight optimal facility placement for facility weights  $\gamma = 0, \gamma = 1$  and  $\gamma = 10$ . Both scales are logarithmic. The bottom-right plot depicts the facilities eventually placed by our Algorithm 2 which coincides with the optimal configuration

1185

Table 1: Ratio of the overall cost of both algorithms with respect to to the hindsight optimal (20 runs).

| MovingClients | $\gamma = 0$      | $\gamma = 1$      | $\gamma = 10$     |
|---------------|-------------------|-------------------|-------------------|
| [30]          | $1.297 \pm 0.045$ | $1.943 \pm 0.466$ | $3.388 \pm 1.335$ |
| Algorithm 2   | $1.083 \pm 0.001$ | $1.091 \pm 0.001$ | $1.343 \pm 0.014$ |

1186 **Real-World Datasets.** We evaluate the performance of Algorithm 2 on the MNIST and CIFAR10  
1187 datasets. We randomly sample  $N = 10000$  images and construct a graph where each image  
1188 corresponds to a vertex with the edge weights given by the Euclidean distance of the respective  
1189 images. At each round  $t$ , an image is sampled uniformly at random and a client arrives in the  
1190 corresponding vertex. We then evaluate Algorithm 2 in the latter setting for  $T = 3000$  rounds and  
1191  $k = 10$  facilities. In Table 2 we present the ratio of the overall cost of Algorithm 2 over the ratio cost  
1192 of the fractional hindsight optimal<sup>5</sup>. As our experiments indicate, the sub-optimality of Algorithm 2  
1193 is way smaller than the theoretical  $\mathcal{O}(\log n)$  upper bound on the regret.

Table 2: The ratio of the cost of Algorithm 2 with respect to the cost of the fractional hindsight optimal facility placement (20 runs).

| Algorithm 2 | $\gamma = 0$     | $\gamma = 1$     | $\gamma = 10$     |
|-------------|------------------|------------------|-------------------|
| MNIST       | $1.118 \pm 0.01$ | $1.403 \pm 0.04$ | $1.5631 \pm 0.03$ |
| CIFAR10     | $1.113 \pm 0.01$ | $1.189 \pm 0.04$ | $1.59 \pm 0.31$   |

---

<sup>5</sup>The cost of the fractional hindsight optimal can be efficiently computed [30] and lower bounds the cost of the optimal facility placement. As a result, the presented ratios in Table 2 are upper bounds on the actual ratio of Algorithm 2 and the optimal facility-placement.
